# Supplementary material
Source: MDPI journal article supplement (https://www.mdpi.com/2624-8549/5/1/29)

# Gold(III) Chloride mediated transformation of furfural to the *trans*-*N,N*-4,5-diaminocyclopent-2- enones in the presence of anilines

Marina A. Tzani and Ioannis N. Lykakis\*

*Department of Chemistry, Aristotle University of Thessaloniki, University Campus 54124,  
Thessaloniki, Greece; E-mail: lykakis@chem.auth.gr*

| <b>Table of Contents</b>                                                                                                  | <b>Pages</b> |
|---------------------------------------------------------------------------------------------------------------------------|--------------|
| Table S1. Ratios in terms of the price over milligram of the catalysts                                                    | 2            |
| Table S2. Solvent screening for the synthesis of <b>4</b> from the reaction between <b>1</b> and <b>2</b>                 | 3            |
| Table S3. Salts screening for the synthesis of cyclopentenones                                                            | 4            |
| Table S4. Catalyst screening under photoirradiation conditions (Xenon Lamp)                                               | 5            |
| <sup>1</sup> H and <sup>13</sup> C{H} NMR data of <i>trans</i> -DACPs <b>4</b> , <b>4a-4d</b> , <b>5a-5o</b>              | 6 - 13       |
| Copies of <sup>1</sup> H and <sup>13</sup> C{H} NMR spectra of <i>trans</i> -DACPs <b>4</b> , <b>4a-4d</b> , <b>5a-5o</b> | 14 - 33      |

**Table S1.** Ratios in terms of the price over milligram of the catalysts

| <b>Lewis Acids</b>                   | <b>Cas Number</b> | <b>Price/mg<sup>a</sup></b> | <b>Loading (%)<sup>b</sup></b> | <b>Reaction Scale (mmol)<sup>b</sup></b> | <b>Cost/reaction</b> |
|--------------------------------------|-------------------|-----------------------------|--------------------------------|------------------------------------------|----------------------|
| Sc(OTf) <sub>3</sub>                 | 144026-79-9       | 0.0414                      | 10                             | 0.5                                      | 1.01                 |
| Dy(OTf) <sub>3</sub>                 | 139177-62-1       | 0.0142                      | 10                             | 0.5                                      | 0.43                 |
| <b>AuCl<sub>3</sub></b>              | <b>13453-07-1</b> | <b>0.1092</b>               | <b>1.5</b>                     | <b>0.5</b>                               | <b>0.25</b>          |
| AlCl <sub>3</sub>                    | 7446-70-0         | 0.0234                      | 10                             | 0.5                                      | 0.17                 |
| Cu(OTf) <sub>2</sub>                 | 34946-82-2        | 0.0177                      | 0.1                            | 1                                        | 0.06                 |
| ErCl <sub>3</sub> ·6H <sub>2</sub> O | 10025-75-9        | 0.0053                      | 0.1                            | 1                                        | 0.02                 |

<sup>a</sup>All added values of pack sizes (5g) with the corresponding costs in Euro were obtained from Sigma-Aldrich. <sup>b</sup>Loading of the catalysts as well as the reaction scales were obtained from the corresponding articles.

**Table S2.** Solvent screening for the synthesis of **4** from the reaction between **1** and **2**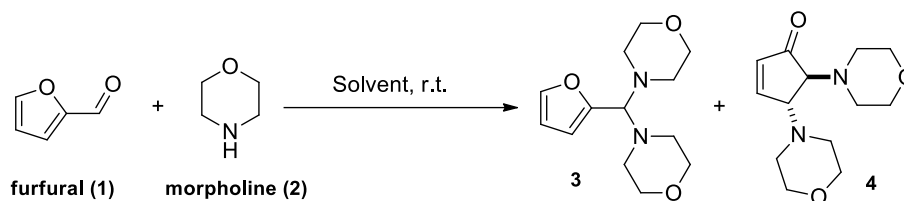

| Entry                                                                            | Solvent          | Time (h) | 1 (%) | 3 (%) | 4 (%) |
|----------------------------------------------------------------------------------|------------------|----------|-------|-------|-------|
| 1                                                                                | MeOH             | 6        | 11    | 40    | 49    |
| 2                                                                                | MeOH             | 18       | 5     | 10    | 85    |
| 3                                                                                | EtOH             | 18       | 12    | 8     | 80    |
| 4                                                                                | DCE              | 6        | 23    | 37    | 40    |
| 5                                                                                | DCE              | 18       | 11    | 48    | 41    |
| 6                                                                                | EtOAc            | 6        | 28    | 34    | 38    |
| 7                                                                                | EtOAc            | 18       | 11    | 73    | 16    |
| 8                                                                                | Toluene          | 6        | 17    | 46    | 37    |
| 9                                                                                | Toluene          | 18       | 10    | 58    | 32    |
| 10                                                                               | DMSO             | 6        | 20    | 65    | 15    |
| 11                                                                               | DMSO             | 18       | 42    | 56    | 23    |
| 12                                                                               | DMF              | 6        | 21    | 37    | 42    |
| 13                                                                               | DMF              | 18       | 25    | -     | 75    |
| 14                                                                               | DMC              | 6        | 18    | 59    | 23    |
| 15                                                                               | DMC              | 18       | 8     | 66    | 26    |
| 16                                                                               | THF              | 6        | 27    | 40    | 33    |
| 17                                                                               | THF              | 18       | 13    | 51    | 36    |
| 18                                                                               | H <sub>2</sub> O | 1        | 15    | 65    | 20    |
| <sup>[a]</sup> furfural (0.2 mmol), morpholine (0.44 mmol) and methanol (0.2 mL) |                  |          |       |       |       |
| <sup>[b]</sup> furfural (0.5 mmol), morpholine (1.1 mmol) and methanol (0.2 mL)  |                  |          |       |       |       |

**Table S3.** Salts screening for the synthesis of cyclopentenones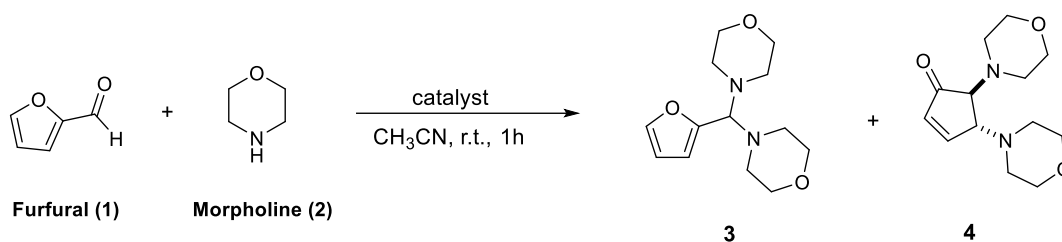

| Entry | Catalyst                             | Catalyst<br>% mmol | 1 (%) | 3 (%) | 4 (%) | Unidentified<br>product (%) |
|-------|--------------------------------------|--------------------|-------|-------|-------|-----------------------------|
| 1     | HCl (6M)                             | 6%                 | -     | -     | 89    | -                           |
| 2     | HCl (6M)                             | 3%                 | -     | 29    | 40    | -                           |
| 4     | CuCl <sub>2</sub> •2H <sub>2</sub> O | 3%                 | -     | -     | 95    | -                           |
| 5     | CuCl                                 | 6%                 | 15    | 37    | 22    | 26                          |
| 6     | MgCl <sub>2</sub>                    | 50%                | -     | -     | 78    | 22                          |
| 7     | ZnCl <sub>2</sub>                    | 50%                | 12    | -     | 88    | -                           |
| 8     | NH <sub>4</sub> Cl                   | 50%                | -     | -     | 100   | -                           |
| 9     | NH <sub>4</sub> Cl                   | 10%                | 9     | 34    | 57    | -                           |
| 10    | CoCl <sub>2</sub> •6H <sub>2</sub> O | 6%                 | 18    | 41    | 41    | -                           |
| 11    | Co(acac) <sub>2</sub>                | 3%                 | 43    | 57    | -     | -                           |
| 12    | Co(acac) <sub>3</sub>                | 3%                 | 73    | 27    | -     | -                           |
| 13    | Fe(acac) <sub>3</sub>                | 3%                 | 22    | 50    | -     | 28                          |
| 14    | FeCl <sub>3</sub>                    | 6%                 | 12    | -     | 88    | -                           |
| 15    | AgNO <sub>3</sub>                    | 6%                 | 28    | 50    | 22    | -                           |
| 16    | AgOTf                                | 6%                 | 15    | 20    | 65    | -                           |

Reaction's Conditions: furfural (0.2 mmol), morpholine (0.44 mmol) in acetonitrile (0.2 ml) at room temperature. All yields were measured from the <sup>1</sup>H NMR spectra of the corresponding crude mixtures, and calculated by the addition of 1,3,5-trimethoxybenzene (0.1 mmol) as internal standard.

**Table S4.** Catalyst screening under photoirradiation conditions (Xenon Lamp)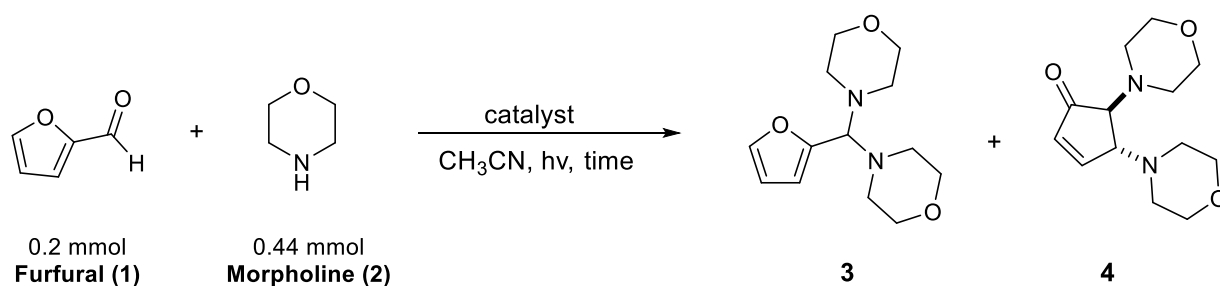

| Entry <sup>[a]</sup> | Catalyst                          | Catalyst % mmol | Time   | 1 (%) | 3 (%) | 4 (%) |
|----------------------|-----------------------------------|-----------------|--------|-------|-------|-------|
| 1                    | Au/TiO <sub>2</sub>               | 2%              | 10 min | 13    | 68    | 19    |
| 2                    | Au/Al <sub>2</sub> O <sub>3</sub> | 2%              | 10 min | -     | 100   | -     |
| 3                    | Au/ZnO                            | 2%              | 10 min | 13    | 66    | 21    |
| 4                    | HAuCl <sub>4</sub>                | 3%              | 10 min | -     | -     | 100   |
| 5                    | AuCl                              | 3%              | 10 min | 12    | 19    | 70    |
| 6 <sup>[b]</sup>     | Au (I)                            | 3%              | 30 min | 11    | 49    | 19    |
| 7 <sup>[b]</sup>     | Au (I)                            | 3%              | 10 min | 10    | 58    | 12    |
| 8 <sup>[b]</sup>     | Rose Bengal                       | 1%              | 10 min | -     | 70    | -     |
| 9                    | 9,10-DCA                          | 5%              | 10 min | 21    | 69    | 10    |
| 10 <sup>[b]</sup>    | Eosin Y                           | 2%              | 10 min | 9     | 66    | -     |

<sup>[a]</sup> Reaction conditions: 1 (0.2 mmol), 2 (0.44 mmol), CH<sub>3</sub>CN (0.5 ml), 25 °C, Xenon lamp 300 Watt,  $\lambda > 320\text{nm}$ . <sup>[b]</sup> Unidentified product was observed in 21%, 20%, 30% and 25% relative yield, respectively. All yields were determined from the crude <sup>1</sup>H NMR mixture of the reaction. and calculated by the addition of 1,3,5-trimethoxybenzene (0.1 mmol) as internal standard.

**<sup>1</sup>H and <sup>13</sup>C{H} NMR data of *trans*-DACPs 4, 4a-4d, 5a-5o**

|                                                                                                                                                                                                                                                                                                                                                                                                                                                                                                                                                                                                                                                                                                                                                                                                                                                                                                                                                                                                                                                                                            |                                                                                                                                   |
|--------------------------------------------------------------------------------------------------------------------------------------------------------------------------------------------------------------------------------------------------------------------------------------------------------------------------------------------------------------------------------------------------------------------------------------------------------------------------------------------------------------------------------------------------------------------------------------------------------------------------------------------------------------------------------------------------------------------------------------------------------------------------------------------------------------------------------------------------------------------------------------------------------------------------------------------------------------------------------------------------------------------------------------------------------------------------------------------|-----------------------------------------------------------------------------------------------------------------------------------|
| <p><i>trans</i>-4,5-dimorpholinocyclopent-2-en-1-one (<b>4</b>):<sup>S1</sup> 241 mg, dark red oil, 95 % yield, purified by column chromatography on a silica gel using a gradient mixture of EtOAc – Hexane (10:1 – 2:1); <sup>1</sup>H NMR (500 MHz, CDCl<sub>3</sub>) δ 7.61 (dd, <i>J</i><sub>1</sub> = 6.0 Hz, <i>J</i><sub>2</sub> = 2.0 Hz, 1H), 6.24 (dd, <i>J</i><sub>1</sub> = 6.0 Hz, <i>J</i><sub>2</sub> = 2.0 Hz, 1H), 3.80 (dd, <i>J</i><sub>1</sub> = 4.5 Hz, <i>J</i><sub>2</sub> = 2.0 Hz, 1H), 3.72 (t, <i>J</i> = 5.0 Hz, 4H), 3.68 (t, <i>J</i> = 4.7 Hz, 4H), 3.28 (d, <i>J</i> = 3.0 Hz, 1H), 2.85 – 2.80 (m, 2H), 2.68 – 2.56 (m, 6H); <sup>13</sup>C{H} NMR (125 MHz, CDCl<sub>3</sub>) δ 206.2, 160.7, 135.6, 68.2, 67.4, 67.3, 66.8, 50.3, 50.0; HRMS (ESI) [M + H]<sup>+</sup> calcd for C<sub>13</sub>H<sub>21</sub>N<sub>2</sub>O<sub>3</sub> : 253.1552, found: 253.1556.</p>                                                                                                                                                                               | 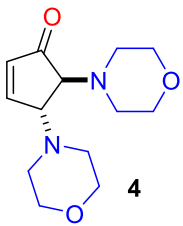 <p style="text-align: right;"><b>4</b></p>    |
| <p><i>trans</i>-4,5-di(piperidin-1-yl)cyclopent-2-en-1-one (<b>4a</b>):<sup>S2</sup> 154 mg, dark red oil, 62 % yield, purified by column chromatography on a silica gel using a gradient mixture of EtOAc – Hexane (10:1 – 2:1); <sup>1</sup>H NMR (500 MHz, CDCl<sub>3</sub>) δ 7.55 (dd, <i>J</i><sub>1</sub> = 6.0 Hz, <i>J</i><sub>2</sub> = 2.0 Hz, 1H), 6.13 (dd, <i>J</i><sub>1</sub> = 6.0 Hz, <i>J</i><sub>2</sub> = 1.5 Hz, 1H), 3.77 (dd, <i>J</i><sub>1</sub> = 4.5 Hz, <i>J</i><sub>2</sub> = 2.5 Hz, 1H), 3.25 (d, <i>J</i> = 2.5 Hz, 1H), 2.71 (dt, <i>J</i><sub>1</sub> = 11 Hz, <i>J</i><sub>2</sub> = 5.0 Hz, 2H), 2.57 – 2.47 (m, 6H), 1.58 (dt, <i>J</i><sub>1</sub> = 11.5 Hz, <i>J</i><sub>2</sub> = 5.5 Hz, 4H), 1.52 (dt, <i>J</i><sub>1</sub> = 11.5 Hz, <i>J</i><sub>2</sub> = 5.5 Hz, 4H), 1.48 – 1.38 (m, 4H); <sup>13</sup>C{H} NMR (125 MHz, CDCl<sub>3</sub>) δ 208.0, 162.1, 134.9, 68.5, 67.7, 51.2, 50.8, 26.7, 26.4, 24.5, 24.4; HRMS (ESI) [M + H]<sup>+</sup> calcd for C<sub>15</sub>H<sub>25</sub>N<sub>2</sub>O : 249.1967, found : 249.1970.</p> |  <p style="text-align: right;"><b>4a</b></p>   |
| <p><i>trans</i>-4,5-bis(3-methylpiperidin-1-yl)cyclopent-2-en-1-one (<b>4b</b>):<sup>S1</sup> 182 mg, dark red oil, 66 % yield, purified by column chromatography on a silica gel using a gradient mixture of EtOAc – Hexane (10:1 – 2:1); <sup>1</sup>H NMR (500 MHz, CDCl<sub>3</sub>) δ 7.55 (tdd, <i>J</i><sub>1</sub> = 6.5 Hz, <i>J</i><sub>2</sub> = 2.5 Hz, <i>J</i><sub>3</sub> = 1.5 Hz, 1H), 6.14 – 6.12 (m, 1H), 3.80 – 3.74 (m, 1H), 3.26 – 3.24 (m, 1H), 2.85 – 2.79 (m, 1H), 2.73 – 2.58 (m, 4H), 2.41 – 2.14 (m, 3H), 1.99 – 1.78 (m, 2H), 1.70 – 1.45 (m, 6H), 0.92 – 0.80 (m, 8H); <sup>13</sup>C{H} NMR (125 MHz, CDCl<sub>3</sub>) δ 208.1, 208.0, 207.9 (2C), 162.2, 162.1, 162.0 (2C), 134.9 (2C), 68.5, 68.4, 68.1, 68.0, 67.7, 67.4 (2C), 59.3, 59.2, 59.0 (2C), 57.4, 56.9, 56.8, 51.7, 51.6, 51.5, 50.0, 49.9, 49.4, 49.3, 33.1 (2C), 32.9, 31.9 (2C), 31.6 (2C), 31.5 (2C), 26.2 (2C), 25.9 (4C), 25.8 (2C), 19.7 (3C), 19.6 (2C); HRMS (ESI) [M + H]<sup>+</sup> calcd for C<sub>17</sub>H<sub>29</sub>N<sub>2</sub>O : 277.2280, found : 277.2284.</p>        |  <p style="text-align: right;"><b>4b</b></p> |

|                                                                                                                                                                                                                                                                                                                                                                                                                                                                                                                                                                                                                                                                                                                                                                                                                                                                                                                                                                                          |                                                                                                                                    |
|------------------------------------------------------------------------------------------------------------------------------------------------------------------------------------------------------------------------------------------------------------------------------------------------------------------------------------------------------------------------------------------------------------------------------------------------------------------------------------------------------------------------------------------------------------------------------------------------------------------------------------------------------------------------------------------------------------------------------------------------------------------------------------------------------------------------------------------------------------------------------------------------------------------------------------------------------------------------------------------|------------------------------------------------------------------------------------------------------------------------------------|
| <p><i>trans</i>-4,5-bis(dimethylamino)cyclopent-2-en-1-one (<b>4c</b>):<sup>S1</sup> 103 mg, dark red oil, 61 % yield, purified by column chromatography on a silica gel using a gradient mixture of EtOAc – Hexane (10:1 – 2:1); <sup>1</sup>H NMR (500 MHz, CDCl<sub>3</sub>) δ 7.57 (dd, <i>J</i><sub>1</sub> = 6.0 Hz, <i>J</i><sub>2</sub> = 2.0 Hz, 1H), 6.19 (dd, <i>J</i><sub>1</sub> = 6.0 Hz, <i>J</i><sub>2</sub> = 1.5 Hz, 1H), 3.72 (dd, <i>J</i><sub>1</sub> = 4.5 Hz, <i>J</i><sub>2</sub> = 2.0 Hz, 1H), 3.20 (d, <i>J</i> = 3.0 Hz, 1H), 2.41 (s, 6H), 2.34 (s, 6H); <sup>13</sup>C{H} NMR (125 MHz, CDCl<sub>3</sub>) δ 207.5, 161.3, 135.3, 68.0, 67.2, 42.0, 41.9; HRMS (ESI) [M + H]<sup>+</sup> calcd for C<sub>9</sub>H<sub>17</sub>N<sub>2</sub>O : 169.1340, found : 169.1341.</p>                                                                                                                                                                              | 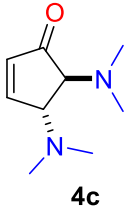 <p style="text-align: center;"><b>4c</b></p>   |
| <p><i>trans</i>-4,5-bis(methyl(phenyl)amino)cyclopent-2-en-1-one (<b>4d</b>):<sup>S2</sup> 152 mg, dark red oil, 52 % yield, purified by column chromatography on a silica gel using a gradient mixture of EtOAc – Hexane (10:1 – 2:1); <sup>1</sup>H NMR (500 MHz, CDCl<sub>3</sub>) δ 7.62 (dd, <i>J</i><sub>1</sub> = 6.5 Hz, <i>J</i><sub>2</sub> = 2.0 Hz, 1H), 7.22 – 7.18 (m, 4H), 6.82 – 6.74 (m, 4H), 6.60 (d, <i>J</i> = 8.0 Hz, 2H), 6.48 (dd, <i>J</i><sub>1</sub> = 6.0 Hz, <i>J</i><sub>2</sub> = 2.0 Hz, 1H), 5.22 – 5.20 (m, 1H), 4.36 (d, <i>J</i> = 3.5 Hz, 1H), 2.86 (s, 3H), 2.85 (s, 3H); <sup>13</sup>C{H} NMR (125 MHz, CDCl<sub>3</sub>) δ 202.0, 161.4, 148.9, 148.6, 134.3, 129.1, 129.0, 118.4, 117.9, 114.1, 113.6, 69.7, 62.4, 36.7, 33.6; HRMS (ESI) [M + H]<sup>+</sup> calcd for C<sub>19</sub>H<sub>21</sub>N<sub>2</sub>O : 293.1648, found : 293.1645.</p>                                                                                            |  <p style="text-align: center;"><b>4d</b></p>   |
| <p><i>trans</i>-4,5-bis((4-chlorophenyl)amino)cyclopent-2-en-1-one (<b>5a</b>):<sup>S1</sup> 149 mg, dark red oil, 89 % yield, purified by column chromatography on a silica gel using a gradient mixture of EtOAc – Hexane (10:1 – 2:1); <sup>1</sup>H NMR (500 MHz, CDCl<sub>3</sub>) δ 7.58 (dd, <i>J</i><sub>1</sub> = 6.0 Hz, <i>J</i><sub>2</sub> = 2.0 Hz, 1H), 7.15 (d, <i>J</i> = 9.0 Hz, 2H), 7.08 (d, <i>J</i> = 9.0 Hz, 2H), 6.69 (d, <i>J</i> = 9.0 Hz, 2H), 6.64 (d, <i>J</i> = 9.0 Hz, 2H), 6.42 (dd, <i>J</i><sub>1</sub> = 6.0 Hz, <i>J</i><sub>2</sub> = 1.5 Hz, 1H), 4.51 (d, <i>J</i> = 7.0 Hz, 1H), 4.42 (s, 1H), 4.01 (d, <i>J</i> = 8.5 Hz, 1H), 3.81 (s, 1H); <sup>13</sup>C{H} NMR (125 MHz, CDCl<sub>3</sub>) δ 203.1, 160.4, 145.7, 144.5, 132.9, 129.6, 129.3, 124.2, 123.9, 115.4, 115.2, 66.7, 62.5; HRMS (ESI) [M + H]<sup>+</sup> calcd for C<sub>17</sub>H<sub>15</sub>Cl<sub>2</sub>N<sub>2</sub>O : 333.0556/335.0526, found : 333.0554/335.0516.</p> |  <p style="text-align: center;"><b>5a</b></p> |

|                                                                                                                                                                                                                                                                                                                                                                                                                                                                                                                                                                                                                                                                                                                                                                                                                                                                                                                                                                                                                                                                                                                                                                                                                                                                            |                                                                                                                                    |
|----------------------------------------------------------------------------------------------------------------------------------------------------------------------------------------------------------------------------------------------------------------------------------------------------------------------------------------------------------------------------------------------------------------------------------------------------------------------------------------------------------------------------------------------------------------------------------------------------------------------------------------------------------------------------------------------------------------------------------------------------------------------------------------------------------------------------------------------------------------------------------------------------------------------------------------------------------------------------------------------------------------------------------------------------------------------------------------------------------------------------------------------------------------------------------------------------------------------------------------------------------------------------|------------------------------------------------------------------------------------------------------------------------------------|
| <p><i>trans</i>-4,5-bis((2-chlorophenyl)amino)cyclopent-2-en-1-one (<b>5b</b>):<sup>SI</sup> 116 mg, dark red oil, 69 % yield, purified by column chromatography on a silica gel using a gradient mixture of EtOAc – Hexane (10:1 – 2:1); <sup>1</sup>H NMR (500 MHz, CDCl<sub>3</sub>) δ 7.58 (dd, <i>J</i><sub>1</sub> = 6.0 Hz, <i>J</i><sub>2</sub> = 1.5 Hz, 1H), 7.33 (dd, <i>J</i><sub>1</sub> = 8.0 Hz, <i>J</i><sub>2</sub> = 1.0 Hz, 1H), 7.28 (dd, <i>J</i><sub>1</sub> = 8.0 Hz, <i>J</i><sub>2</sub> = 1.0 Hz, 1H), 7.09 (t, <i>J</i> = 8.0 Hz, 1H), 7.01 (t, <i>J</i> = 8.0 Hz, 1H), 6.80 (d, <i>J</i> = 8.5 Hz, 1H), 6.77 (d, <i>J</i> = 8.0 Hz, 1H), 6.74 (t, <i>J</i> = 7.5 Hz, 1H), 6.69 (t, <i>J</i> = 8.0 Hz, 1H), 6.47 (dd, <i>J</i><sub>1</sub> = 6.0 Hz, <i>J</i><sub>2</sub> = 1.0 Hz, 1H), 5.09 (d, <i>J</i> = 4.0 Hz, 1H), 4.74 (d, <i>J</i> = 9.5 Hz, 1H), 4.65 (d, <i>J</i> = 9.0 Hz, 1H), 4.02 – 3.99 (m, 1H); <sup>13</sup>C{H} NMR (125 MHz, CDCl<sub>3</sub>) δ 202.6, 160.0, 142.9, 142.0, 133.1, 129.7, 129.4, 128.2, 128.0, 120.2, 120.1, 119.3, 119.1, 113.0, 112.7, 66.3, 61.9; HRMS (ESI) [M + H]<sup>+</sup> calcd for C<sub>17</sub>H<sub>15</sub>Cl<sub>2</sub>N<sub>2</sub>O : 333.0556/335.0526, found : 333.0583/335.0543.</p> | 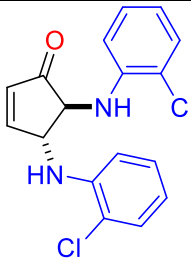 <p style="text-align: center;"><b>5b</b></p>   |
| <p><i>trans</i>-4,5-bis((4-bromophenyl)amino)cyclopent-2-en-1-one (<b>5c</b>):<sup>SI</sup> 154 mg, dark red oil, 73% yield, purified by column chromatography on a silica gel using a gradient mixture of EtOAc – Hexane (10:1 – 2:1); <sup>1</sup>H NMR (500 MHz, CDCl<sub>3</sub>) δ 7.52 (dd, <i>J</i><sub>1</sub> = 6.0 Hz, <i>J</i><sub>2</sub> = 2.0 Hz, 1H), 7.25 (d, <i>J</i> = 8.5 Hz, 2H), 7.17 (d, <i>J</i> = 9.0 Hz, 2H), 6.56 (t, <i>J</i> = 9.0 Hz, 4H), 6.36 (dd, <i>J</i><sub>1</sub> = 6.0 Hz, <i>J</i><sub>2</sub> = 1.0 Hz, 1H), 4.47 – 4.45 (m, 2H), 4.15 (d, <i>J</i> = 9.5 Hz, 1H), 3.76 – 3.75 (m, 1H); <sup>13</sup>C{H} NMR (125 MHz, CDCl<sub>3</sub>) δ 203.2, 160.5, 146.0, 144.9, 132.7, 132.3, 132.1, 115.6, 115.5, 110.8, 110.6, 66.3, 61.7; HRMS (ESI) [M + H]<sup>+</sup> calcd for C<sub>17</sub>H<sub>15</sub>Br<sub>2</sub>N<sub>2</sub>O : 420.9546/422.9525/424.9520, found : 420.9542/422.9549/424.9533.</p>                                                                                                                                                                                                                                                                                                                       |  <p style="text-align: center;"><b>5c</b></p>  |
| <p><i>trans</i>-4,5-bis((2-fluorophenyl)amino)cyclopent-2-en-1-one (<b>5d</b>): 108 mg, yellow oil, 72% yield, purified by column chromatography on a silica gel using a gradient mixture of EtOAc – Hexane (10:1 – 2:1); <sup>1</sup>H NMR (500 MHz, CDCl<sub>3</sub>) δ 7.60 (dd, <i>J</i><sub>1</sub> = 6.0 Hz, <i>J</i><sub>2</sub> = 2.0 Hz, 1H), 7.05 (ddd, <i>J</i><sub>1</sub> = 11.5 Hz, <i>J</i><sub>2</sub> = 8.0 Hz, <i>J</i><sub>3</sub> = 1.0 Hz, 1H), 6.99 (ddd, <i>J</i><sub>1</sub> = 20 Hz, <i>J</i><sub>2</sub> = 8.5 Hz, <i>J</i><sub>3</sub> = 1.5 Hz, 1H), 6.96 (t, <i>J</i> = 8.0 Hz, 1H), 6.89 – 6.83 (m, 2H), 6.80 (t, <i>J</i> = 8.0 Hz, 1H), 6.76 – 6.71 (m, 1H), 6.70 – 6.66 (m, 1H), 6.46 (dd, <i>J</i><sub>1</sub> = 6.0 Hz, <i>J</i><sub>2</sub> = 1.5 Hz, 1H), 4.69 (s, 1H), 4.63 (dd, <i>J</i><sub>1</sub> = 9.5 Hz, <i>J</i><sub>2</sub> = 1.5 Hz, 1H), 4.30 (dd, <i>J</i><sub>1</sub> = 9.5 Hz, <i>J</i><sub>2</sub> = 3.0 Hz, 1H), 3.94 (dd, <i>J</i><sub>1</sub> = 4.0 Hz, <i>J</i><sub>2</sub> = 3.0 Hz, 1H); <sup>13</sup>C NMR (125 MHz, CDCl<sub>3</sub>) δ 202.9, 160.2, 152.0 (d, <i>J</i> =</p>                                                                                                                                |  <p style="text-align: center;"><b>5d</b></p> |



|                                                                                                                                                                                                                                                                                                                                                                                                                                                                                                                                                                                                                                                                                                                                                                                                                                                                                                                                                                                                                                                                                                                                                                |                                                                                                                                    |
|----------------------------------------------------------------------------------------------------------------------------------------------------------------------------------------------------------------------------------------------------------------------------------------------------------------------------------------------------------------------------------------------------------------------------------------------------------------------------------------------------------------------------------------------------------------------------------------------------------------------------------------------------------------------------------------------------------------------------------------------------------------------------------------------------------------------------------------------------------------------------------------------------------------------------------------------------------------------------------------------------------------------------------------------------------------------------------------------------------------------------------------------------------------|------------------------------------------------------------------------------------------------------------------------------------|
| <p>239 Hz), 135.0 (dd, <math>J = 126</math> Hz, <math>J = 11</math> Hz), 124.9 (dd, <math>J = 26</math> Hz, <math>J = 4</math> Hz), 118.8 (dd, <math>J = 28</math> Hz, <math>J = 7</math> Hz), 118.8 (dd, <math>J = 45</math> Hz, <math>J = 19</math> Hz), 115.0 (dd, <math>J = 28</math> Hz, <math>J = 7</math> Hz), 113.8 (dd, <math>J = 33</math> Hz, <math>J = 3</math> Hz), 66.3, 62.0; Rf = 0.4 (Hex/EtOAc=2/1); HRMS (ESI) <math>[M + H]^+</math> calcd for <math>C_{17}H_{15}F_2N_2O</math> : 301.1152, found : 301.1149.</p>                                                                                                                                                                                                                                                                                                                                                                                                                                                                                                                                                                                                                          |                                                                                                                                    |
| <p><i>trans</i>-4,5-bis((4-fluorophenyl)amino)cyclopent-2-en-1-one (<b>5e</b>): 121 mg, yellow oil, 81% yield, purified by column chromatography on a silica gel using a gradient mixture of EtOAc – Hexane (10:1 – 2:1); <math>^1H</math> NMR (500 MHz, <math>CDCl_3</math>) <math>\delta</math> 7.60 (dd, <math>J_1 = 6.0</math> Hz, <math>J_2 = 2.0</math> Hz, 1H), 6.91 (t, <math>J = 8.5</math> Hz, 2H), 6.84 (t, <math>J = 9.0</math> Hz, 2H), 6.76 – 6.73 (m, 2H), 6.69 – 6.66 (m, 2H), 6.41 (dd, <math>J_1 = 6.0</math> Hz, <math>J_2 = 1.5</math> Hz, 1H), 4.49 (s, 1H), 4.33 (br s, 1H), 3.91 (br s, 1H), 3.78 (d, <math>J = 3.0</math> Hz, 1H); <math>^{13}C</math> NMR (125 MHz, <math>CDCl_3</math>) <math>\delta</math> 203.6, 160.7, 156.8 (dd, <math>J = 237</math> Hz, <math>J = 10</math> Hz), 142.9 (dd, <math>J = 163</math> Hz, <math>J = 3</math> Hz), 132.7, 116.1 (dd, <math>J = 46</math> Hz, <math>J = 22</math> Hz), 115.3 (dd, <math>J = 7</math> Hz, <math>J = 3</math> Hz), 67.3, 63.3; Rf = 0.4 (Hex/EtOAc=2/1); HRMS (ESI) <math>[M + H]^+</math> calcd for <math>C_{17}H_{15}F_2N_2O</math> : 301.1152, found : 301.1149.</p> | 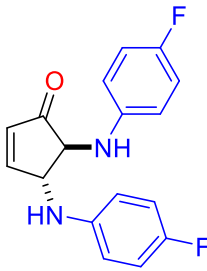 <p style="text-align: center;"><b>5e</b></p>   |
| <p><i>trans</i>-4,5-bis((4-iodophenyl)amino)cyclopent-2-en-1-one (<b>5f</b>): 203 mg, red-brown oil, 79% yield, purified by column chromatography on a silica gel using a gradient mixture of EtOAc – Hexane (10:1 – 2:1); <math>^1H</math> NMR (500 MHz, <math>CDCl_3</math>) <math>\delta</math> 7.56 (d, <math>J = 6.0</math> Hz, 1H), 7.45 (d, <math>J = 8.5</math> Hz, 2H), 7.38 (d, <math>J = 8.5</math> Hz, 2H), 6.52 (d, <math>J = 8.5</math> Hz, 2H), 6.49 (d, <math>J = 8.5</math> Hz, 2H), 6.41 (d, <math>J = 6.0</math> Hz, 1H), 4.50 (s, 1H), 4.43 (s, 1H), 4.06 (d, <math>J = 7.0</math> Hz, 1H), 3.80 (s, 1H); <math>^{13}C</math> NMR (125 MHz, <math>CDCl_3</math>) <math>\delta</math> 203.0, 160.4, 146.7, 145.5, 138.4, 138.1, 133.0, 116.4, 116.2, 80.5, 80.3, 66.4, 62.0; Rf = 0.35 (Hex/EtOAc=2/1); HRMS (ESI) <math>[M + H]^+</math> calcd for <math>C_{17}H_{15}I_2N_2O</math> : 516.9274, found : 516.9271.</p>                                                                                                                                                                                                                      |  <p style="text-align: center;"><b>5f</b></p> |
| <p><i>1,1'-(((trans)-5-oxocyclopent-3-ene-1,2-diyl)bis(azanediyl))-bis(4,1-phenylene))diethanone (<b>5g</b>):<sup>SI</sup> 140 mg, dark purple semisolid, 80% yield, purified by column chromatography on a silica gel using a gradient mixture of EtOAc – Hexane (10:1 – 2:1); <math>^1H</math> NMR (500 MHz, <math>CDCl_3</math>) <math>\delta</math> 7.79 (d, <math>J = 8.5</math> Hz, 2H), 7.71 (d, <math>J = 8.5</math> Hz, 2H), 7.60 (dd, <math>J_1 = 6.0</math> Hz, <math>J_2 = 2.0</math> Hz, 1H), 6.68 (d, <math>J = 9.0</math> Hz, 2H), 6.65 (d, <math>J = 8.5</math> Hz, 2H), 6.45 (dd, <math>J_1 = 6.0</math> Hz, <math>J_2 = 1.5</math> Hz, 1H), 5.04 (d, <math>J = 9.0</math> Hz, 1H), 4.97 (d, <math>J =</math></i></p>                                                                                                                                                                                                                                                                                                                                                                                                                         |  <p style="text-align: center;"><b>5g</b></p> |

|                                                                                                                                                                                                                                                                                                                                                                                                                                                                                                                                                                                                                                                                                                                                                                                                                                                                                                                                                                                                                                                                                                                                                                                                                                                    |                                                                                                                                    |
|----------------------------------------------------------------------------------------------------------------------------------------------------------------------------------------------------------------------------------------------------------------------------------------------------------------------------------------------------------------------------------------------------------------------------------------------------------------------------------------------------------------------------------------------------------------------------------------------------------------------------------------------------------------------------------------------------------------------------------------------------------------------------------------------------------------------------------------------------------------------------------------------------------------------------------------------------------------------------------------------------------------------------------------------------------------------------------------------------------------------------------------------------------------------------------------------------------------------------------------------------|------------------------------------------------------------------------------------------------------------------------------------|
| <p>4.5 Hz, 1H), 4.70 (d, <math>J = 8.5</math> Hz, 1H), 4.06 (dd, <math>J_1 = 5.0</math> Hz, <math>J_2 = 3.5</math> Hz, 1H), 2.48 (s, 3H), 2.44 (s, 3H); <math>^{13}\text{C}\{\text{H}\}</math> NMR (125 MHz, <math>\text{CDCl}_3</math>) <math>\delta</math> 202.2, 196.8, 196.6, 160.1, 151.0, 150.1, 133.3, 131.1, 130.8, 128.4, 128.3, 112.9, 112.6, 65.7, 61.0, 26.3; HRMS (ESI) <math>[\text{M} + \text{Na}]^+</math> calcd for <math>\text{C}_{21}\text{H}_{20}\text{N}_2\text{O}_3\text{Na}</math> : 371.1372, found : 371.1384.</p>                                                                                                                                                                                                                                                                                                                                                                                                                                                                                                                                                                                                                                                                                                        |                                                                                                                                    |
| <p><i>diethyl</i> <i>4,4'-(((trans)-5-oxocyclopent-3-ene-1,2-diyl)-bis(azanediyl))dibenzoate (5h)</i>.<sup>SI</sup> 184 mg, purple solid, m.p. 170-171 °C, 89% yield, precipitated in the solvent system chloroform/hexane; <math>^1\text{H}</math> NMR (500 MHz, <math>\text{CDCl}_3</math>) <math>\delta</math> 7.86 (d, <math>J = 9.0</math> Hz, 2H), 7.79 (d, <math>J = 8.5</math> Hz, 2H), 7.58 (dd, <math>J_1 = 6.0</math> Hz, <math>J_2 = 1.5</math> Hz, 1H), 6.66 (m, 4H), 6.44 (dd, <math>J_1 = 6.0</math> Hz, <math>J_2 = 1.5</math> Hz, 1H), 4.82 (d, <math>J = 4.5</math> Hz, 1H), 4.72 (d, <math>J = 9.5</math> Hz, 1H), 4.66 (d, <math>J = 8.0</math> Hz, 1H), 4.29 (dq, <math>J_1 = 14.5</math> Hz, <math>J_2 = 7.0</math> Hz, 4H), 4.00 – 3.98 (m, 1H), 1.34 (dt, <math>J_1 = 14.0</math> Hz, <math>J_2 = 7.0</math> Hz, 6H); <math>^{13}\text{C}\{\text{H}\}</math> NMR (125 MHz, <math>\text{CDCl}_3</math>) <math>\delta</math> 202.4, 166.7, 166.6, 160.2, 150.7, 149.7, 133.2, 131.9, 131.6, 120.9, 120.7, 112.9, 112.6, 65.9, 61.2, 60.6, 60.5, 14.5 (2C); HRMS (ESI) <math>[\text{M} + \text{Na}]^+</math> calcd for <math>\text{C}_{23}\text{H}_{24}\text{N}_2\text{O}_5\text{Na}</math> : 431.1583, found : 431.1596.</p> | 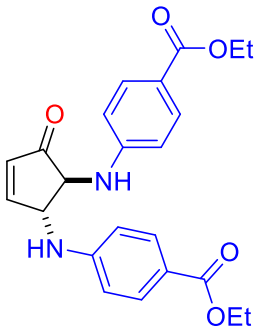 <p style="text-align: center;"><b>5h</b></p>   |
| <p><i>2,2'-(((trans)-5-oxocyclopent-3-ene-1,2-diyl)bis(azanediyl))dibenzoic acid (5i)</i>.<sup>SI</sup> 138 mg, purple solid, m.p. 200-202 °C, 78% yield, precipitated in the solvent system THF/hexane; <math>^1\text{H}</math> NMR (500 MHz, DMSO) <math>\delta</math> 12.75 (br s, 2H), 8.33 (s, 2H), 7.82 (dd, <math>J_1 = 8.0</math> Hz, <math>J_2 = 1.5</math> Hz, 1H), 7.79 (dd, <math>J_1 = 8.0</math> Hz, <math>J_2 = 1.0</math> Hz, 1H), 7.73 (dd, <math>J_1 = 6.5</math> Hz, <math>J_2 = 1.5</math> Hz, 1H), 7.28 (t, <math>J = 7.0</math> Hz, 1H), 7.19 (t, <math>J = 7.5</math> Hz, 1H), 6.91 (d, <math>J = 8.5</math> Hz, 1H), 6.72 (d, <math>J = 8.0</math> Hz, 1H), 6.61 (t, <math>J = 7.5</math> Hz, 1H), 6.58 (t, <math>J = 7.5</math> Hz, 1H), 6.48 (d, <math>J = 6.0</math> Hz, 1H), 4.95 (s, 1H), 4.52 (s, 1H); <math>^{13}\text{C}\{\text{H}\}</math> NMR (125 MHz, DMSO) <math>\delta</math> 203.0, 170.0, 169.8, 160.7, 150.2, 149.6, 134.5, 134.2, 132.4, 131.8, 131.6, 115.5, 115.3, 112.3, 112.1, 110.9, 110.8, 64.8, 59.0; HRMS (ESI) <math>[\text{M} + \text{Na}]^+</math> calcd for <math>\text{C}_{19}\text{H}_{16}\text{N}_2\text{O}_5\text{Na}</math> : 375.0957, found : 375.0966.</p>                           |  <p style="text-align: center;"><b>5i</b></p> |

|                                                                                                                                                                                                                                                                                                                                                                                                                                                                                                                                                                                                                                                                                                                                                                                                                                                                                                                                                                                                                                                      |                                                                                                                                    |
|------------------------------------------------------------------------------------------------------------------------------------------------------------------------------------------------------------------------------------------------------------------------------------------------------------------------------------------------------------------------------------------------------------------------------------------------------------------------------------------------------------------------------------------------------------------------------------------------------------------------------------------------------------------------------------------------------------------------------------------------------------------------------------------------------------------------------------------------------------------------------------------------------------------------------------------------------------------------------------------------------------------------------------------------------|------------------------------------------------------------------------------------------------------------------------------------|
| <p>4,4'-(((<i>trans</i>)-5-oxocyclopent-3-ene-1,2-diyl)bis(azanediyl))dibenzonitrile (<b>5j</b>): 106 mg, yellow oil, 68% yield, purified by column chromatography on a silica gel using a gradient mixture of EtOAc – Hexane (10:1 – 2:1); <sup>1</sup>H NMR (500 MHz, DMSO-d<sub>6</sub>) δ 7.71 (d, <i>J</i> = 6.0 Hz, 1H), 7.46 (d, <i>J</i> = 8.5 Hz, 2H), 7.42 (d, <i>J</i> = 8.5 Hz, 2H), 6.76 (d, <i>J</i> = 8.5 Hz, 2H), 6.67 (d, <i>J</i> = 8.5 Hz, 2H), 6.45 (d, <i>J</i> = 6.0 Hz, 1H), 5.08 (br s, 2H), 4.76 (s, 1H), 4.27 (d, <i>J</i> = 3.0 Hz, 1H); <sup>13</sup>C NMR (125 MHz, DMSO) δ 203.1, 160.9, 151.6, 151.0, 133.5, 133.3, 132.5, 120.4, 120.3, 112.5 (2C), 97.0, 96.7, 63.5, 58.1; R<sub>f</sub> = 0.2 (Hex/EtOAc=2/1); HRMS (ESI) [M + Na]<sup>+</sup> calcd for C<sub>19</sub>H<sub>15</sub>N<sub>4</sub>ONa : 337.1060, found : 337.1058.</p>                                                                                                                                                                            | 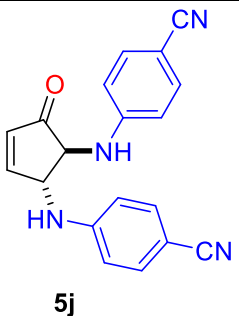 <p style="text-align: center;"><b>5j</b></p>   |
| <p>3,3'-(((<i>trans</i>)-5-oxocyclopent-3-ene-1,2-diyl)bis(azanediyl))dibenzonitrile (<b>5k</b>): 97 mg, yellow oil, 62% yield, purified by column chromatography on a silica gel using a gradient mixture of EtOAc – Hexane (10:1 – 2:1); <sup>1</sup>H NMR (500 MHz, CD<sub>3</sub>OD) δ 7.65 (dd, <i>J</i><sub>1</sub> = 6.0 Hz, <i>J</i><sub>2</sub> = 2.0 Hz, 1H), 7.20 (t, <i>J</i> = 8.0 Hz, 1H), 7.16 (t, <i>J</i> = 8.0 Hz, 1H), 6.99 – 6.87 (m, 6H), 6.41 (dd, <i>J</i><sub>1</sub> = 6.0 Hz, <i>J</i><sub>2</sub> = 1.5 Hz, 1H), 4.84 (br s, 2H), 4.66 (dt, <i>J</i><sub>1</sub> = 3.0 Hz, <i>J</i><sub>2</sub> = 1.5 Hz, 1H), 4.08 (d, <i>J</i> = 3.5 Hz, 1H); <sup>13</sup>C NMR (125 MHz, CD<sub>3</sub>OD) δ 205.5, 162.0, 149.7, 149.1, 133.7, 131.2, 131.2, 131.0, 121.8, 121.8, 121.7, 120.5, 120.2 (2C), 119.0 (2C), 118.3, 116.4, 116.4, 113.8, 113.5, 66.7, 61.4; R<sub>f</sub> = 0.2 (Hex/EtOAc=2/1); HRMS (ESI) [M + Na]<sup>+</sup> calcd for C<sub>19</sub>H<sub>15</sub>N<sub>4</sub>ONa : 337.1062, found : 337.1058.</p> |  <p style="text-align: center;"><b>5k</b></p>  |
| <p><i>trans</i>-4,5-bis((4-nitrophenyl)amino)cyclopent-2-en-1-one (<b>5l</b>):<sup>SI</sup> 121 mg, dark red oil, 68% yield, purified by column chromatography on a silica gel using a gradient mixture of EtOAc – Hexane (10:1 – 2:1); <sup>1</sup>H NMR (500 MHz, CD<sub>3</sub>CN) δ 7.98 (d, <i>J</i> = 9.0 Hz, 2H), 7.96 (d, <i>J</i> = 9.0 Hz, 2H), 7.63 (dd, <i>J</i><sub>1</sub> = 6.0 Hz, <i>J</i><sub>2</sub> = 1.5 Hz, 1H), 6.72 (d, <i>J</i> = 9.0 Hz, 2H), 6.66 (d, <i>J</i> = 9.0 Hz, 2H), 6.42 (dd, <i>J</i><sub>1</sub> = 6.0 Hz, <i>J</i><sub>2</sub> = 1.5 Hz, 1H), 6.09 (d, <i>J</i> = 8.5 Hz, 1H), 5.95 (d, <i>J</i> = 8.0 Hz, 1H), 4.85 – 4.82 (m, 1H), 4.27 (dd, <i>J</i><sub>1</sub> = 8.0 Hz, <i>J</i><sub>2</sub> = 3.5 Hz, 1H); <sup>13</sup>C{H} NMR (125 MHz, CD<sub>3</sub>CN) δ 202.6, 160.4, 154.2, 153.6, 139.2, 133.9, 127.0, 126.8 (2C), 112.8 (2C), 65.5, 60.0;</p>                                                                                                                                               |  <p style="text-align: center;"><b>5l</b></p> |

|                                                                                                                                                                                                                                                                                                                                                                                                                                                                                                                                                                                                                                                                                                                                                                                                                                                                                                                                                                                                                                                                                                         |                                                                                                                                    |
|---------------------------------------------------------------------------------------------------------------------------------------------------------------------------------------------------------------------------------------------------------------------------------------------------------------------------------------------------------------------------------------------------------------------------------------------------------------------------------------------------------------------------------------------------------------------------------------------------------------------------------------------------------------------------------------------------------------------------------------------------------------------------------------------------------------------------------------------------------------------------------------------------------------------------------------------------------------------------------------------------------------------------------------------------------------------------------------------------------|------------------------------------------------------------------------------------------------------------------------------------|
| <p>HRMS (ESI) <math>[M + Na]^+</math> calcd for <math>C_{17}H_{14}N_4O_5Na</math> : 377.0862, found : 377.0867.</p>                                                                                                                                                                                                                                                                                                                                                                                                                                                                                                                                                                                                                                                                                                                                                                                                                                                                                                                                                                                     |                                                                                                                                    |
| <p><i>trans</i>-4,5-bis((3-nitrophenyl)amino)cyclopent-2-en-1-one (<b>5m</b>):<sup>S1</sup> 115 mg, dark red semisolid, 65% yield, purified by column chromatography on a silica gel using a gradient mixture of EtOAc – Hexane (10:1 – 2:1); <sup>1</sup>H NMR (500 MHz, CD<sub>3</sub>OD) <math>\delta</math> 7.70 – 7.68 (m, 1H), 7.50 (t, <math>J</math> = 2.5 Hz, 1H), 7.46 (t, <math>J</math> = 2.0 Hz, 1H), 7.42 – 7.38 (m, 2H), 7.23 (dd, <math>J</math> = 8.5 Hz, 1H), 7.19 (d, <math>J</math> = 7.0 Hz, 1H), 7.05 (ddd, <math>J_1</math> = 8.0 Hz, <math>J_2</math> = 2.0 Hz, <math>J_3</math> = 0.5 Hz, 1H), 7.02 – 6.99 (m, 1H), 6.44 (dd, <math>J_1</math> = 6.5 Hz, <math>J_2</math> = 2.0 Hz, 1H), 4.74 (s, 1H), 4.16 (d, <math>J</math> = 3.0 Hz, 1H); <sup>13</sup>C{H} NMR (125 MHz, CD<sub>3</sub>OD) <math>\delta</math> 205.4, 161.9, 161.9, 150.6, 150.5, 150.2, 149.6, 133.9, 133.8, 130.9, 130.7, 120.4, 120.3, 112.8, 112.7, 107.8, 107.8, 67.0, 61.7; HRMS (ESI) <math>[M + Na]^+</math> calcd for <math>C_{17}H_{14}N_4O_5Na</math> : 377.0862, found : 377.0867.</p>        | 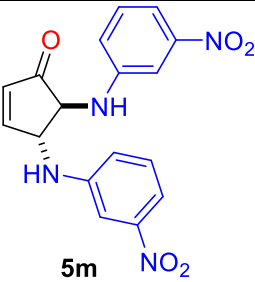 <p style="text-align: center;"><b>5m</b></p>   |
| <p><i>trans</i>-4,5-bis(phenylamino)cyclopent-2-en-1-one (<b>5n</b>):<sup>S3</sup> 71 mg, dark red oil, 54% yield, purified by column chromatography on a silica gel using a gradient mixture of EtOAc – Hexane (10:1 – 2:1); <sup>1</sup>H NMR (500 MHz, CDCl<sub>3</sub>) <math>\delta</math> 7.59 (dd, <math>J_1</math> = 6.0 Hz, <math>J_2</math> = 2.0 Hz, 1H), 7.23 (t, <math>J</math> = 7.5 Hz, 2H), 7.17 (t, <math>J</math> = 8.5 Hz, 2H), 6.84 (t, <math>J</math> = 7.5 Hz, 1H), 6.81 – 6.77 (m, 3H), 6.73 (d, <math>J</math> = 7.5 Hz, 2H), 6.39 (dd, <math>J_1</math> = 5.5 Hz, <math>J_2</math> = 1.0 Hz, 1H), 4.60 (s, 1H), 4.46 (br s, 1H), 4.08 (br s, 1H), 3.86 (d, <math>J</math> = 3.0 Hz, 1H); <sup>13</sup>C{H} NMR (125 MHz, CDCl<sub>3</sub>) <math>\delta</math> 203.9, 161.1, 147.1, 146.0, 132.5, 129.6, 129.4, 119.1, 118.8, 114.1, 114.0, 66.3, 61.8; HRMS (ESI) <math>[M - H]^+</math> calcd for <math>C_{17}H_{15}N_2O</math> : 263.1185, found : 263.1193 and HRMS (ESI) <math>[M + H]^+</math> calcd for <math>C_{17}H_{17}N_2O</math> : 265.1336, found : 265.1349.</p> |  <p style="text-align: center;"><b>5n</b></p>  |
| <p><i>trans</i>-4,5-bis(<i>p</i>-tolylamino)cyclopent-2-en-1-one (<b>5o</b>):<sup>S1</sup> 87 mg, dark red oil, 59% yield, purified by column chromatography on a silica gel using a gradient mixture of EtOAc – Hexane (10:1 – 2:1); <sup>1</sup>H NMR (500 MHz, CDCl<sub>3</sub>) <math>\delta</math> 7.61 (dd, <math>J_1</math> = 6.0 Hz, <math>J_2</math> = 2.0 Hz, 1H), 7.04 (d, <math>J</math> = 8.0 Hz, 2H), 6.98 (d, <math>J</math> = 8.0 Hz, 2H), 6.73 (d, <math>J</math> = 8.5 Hz, 2H), 6.66 (d, <math>J</math> = 8.5 Hz, 2H), 6.38 (dd, <math>J_1</math> = 5.5 Hz, <math>J_2</math> = 1.0 Hz, 1H), 4.56 (s, 1H), 4.33 (br s, 1H), 3.91 (br s, 1H), 3.81 (d, <math>J</math> = 3.0 Hz, 1H), 2.29 (s, 3H), 2.25 (s, 3H); <sup>13</sup>C{H} NMR (125 MHz, CDCl<sub>3</sub>) <math>\delta</math> 204.2, 161.3, 144.9, 143.7, 132.4, 130.1,</p>                                                                                                                                                                                                                                                    |  <p style="text-align: center;"><b>5o</b></p> |

|                                                                                                                                                                                    |  |
|------------------------------------------------------------------------------------------------------------------------------------------------------------------------------------|--|
| 129.9, 128.5, 128.1, 114.4, 114.3, 66.6, 62.4, 20.5 (2C); HRMS (ESI) [M - H] <sup>+</sup> calcd for C <sub>19</sub> H <sub>19</sub> N <sub>2</sub> O : 291.1503, found : 291.1507. |  |
|------------------------------------------------------------------------------------------------------------------------------------------------------------------------------------|--|

- S1. Tzani, M.A.; Fountoulaki, S.; Lykakis, I.N. Polyoxometalate-Driven Easy Conversion of Valuable Furfural to *trans*-*N,N*-4,5-Diaminocyclopenten-2-ones. *J. Org. Chem.* **2022**, *87*, 2601–2615.
- S2. Gomes, R.F.A.; Esteves, N.R.; Coelho, J.A.S.; Afonso, C.A.M. Copper(II) Triflate as a Reusable Catalyst for the Synthesis of *trans*-4,5-Diamino-cyclopent-2-enones in Water. *J. Org. Chem.* **2018**, *83*, 7509–7513.
- S3. Peewasan, K.; Merkel, M.P.; Fuhr, O.; Powell, A.K.A Designed and Potentially Decadentate Ligand for use in Lanthanide(III) Catalysed Biomass Transformations: Targeting Diastereoselective *trans*-4,5-Diaminocyclopentenone Derivatives. *Dalton Trans.* **2020**, *49*, 2331–2336.

Copies of  $^1\text{H}$  and  $^{13}\text{C}\{^1\text{H}\}$  NMR spectra of *trans*-DACPs 4, 4a-4d, 5a-5o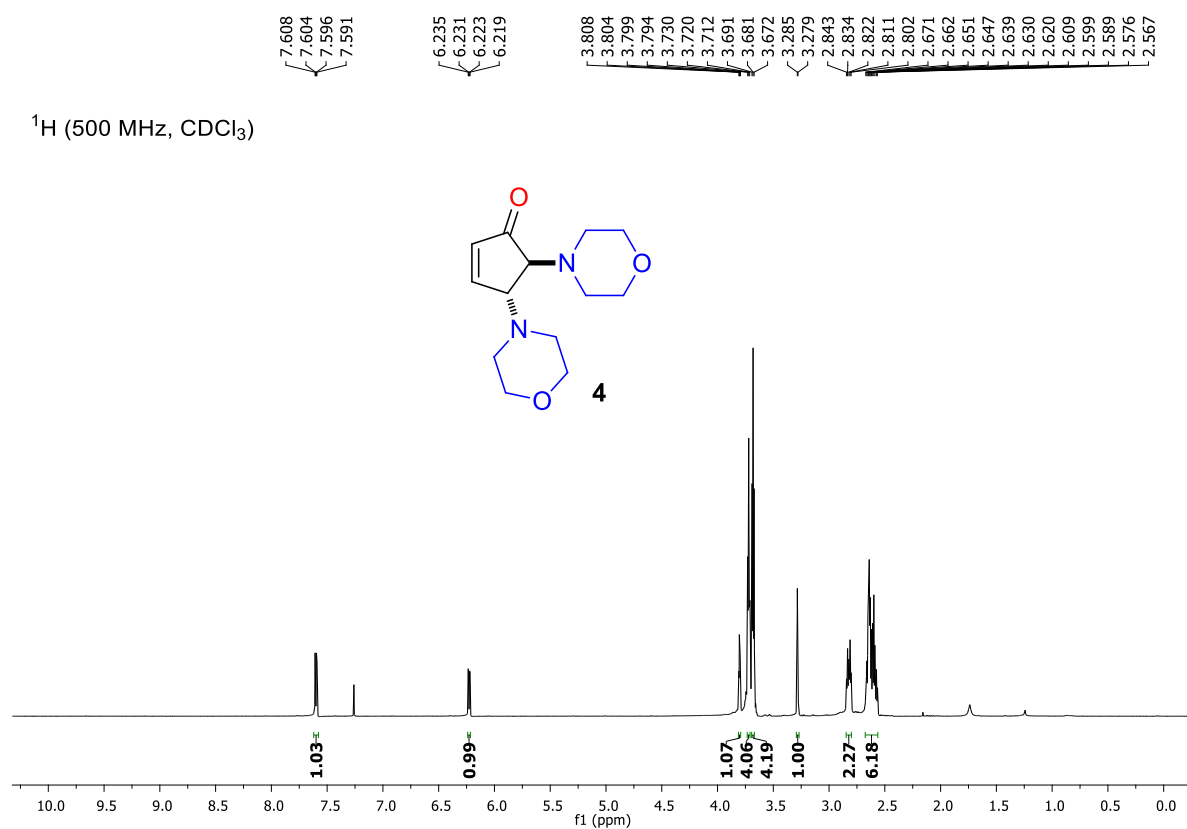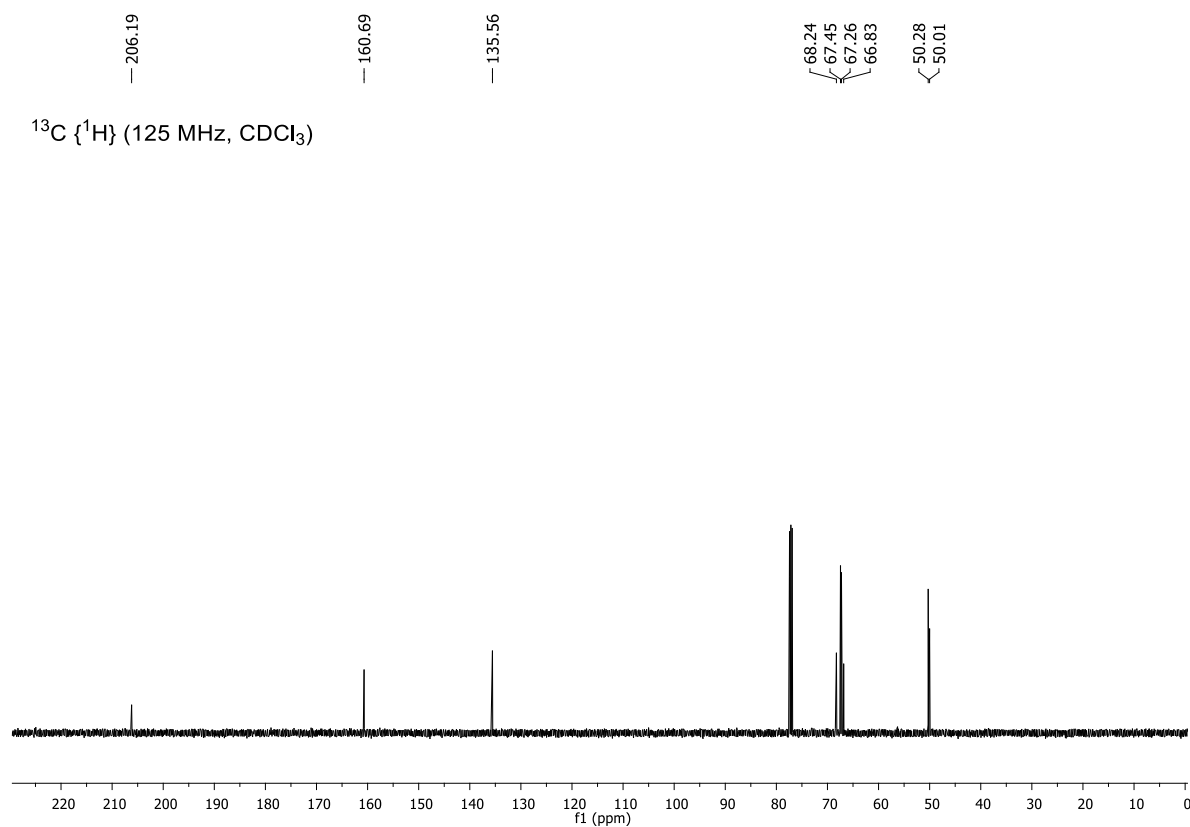

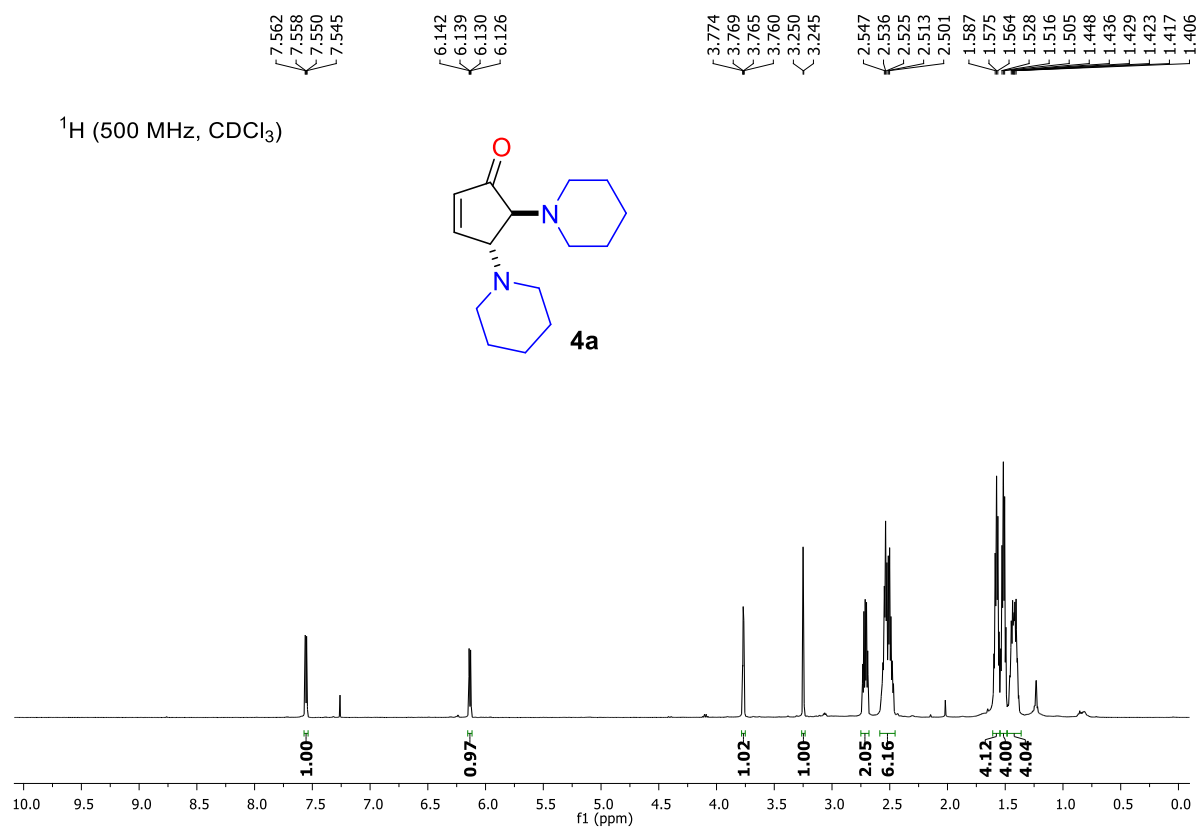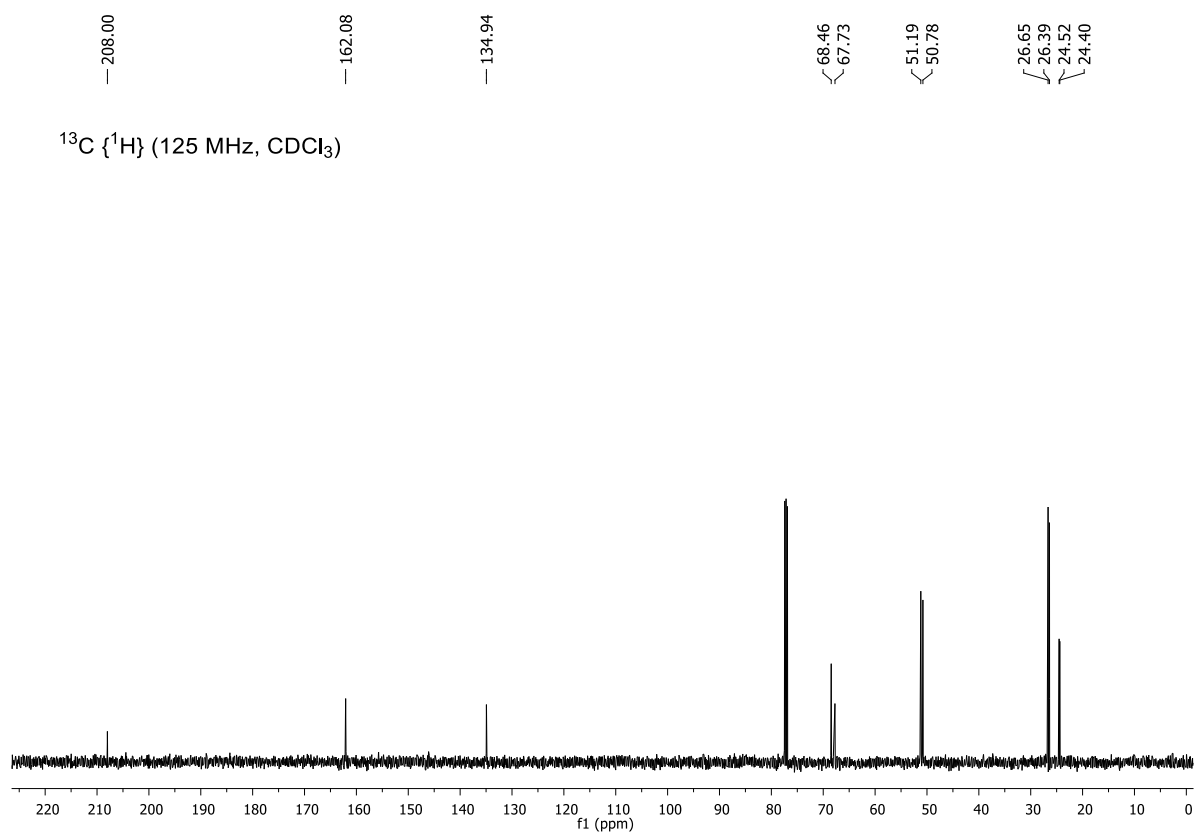

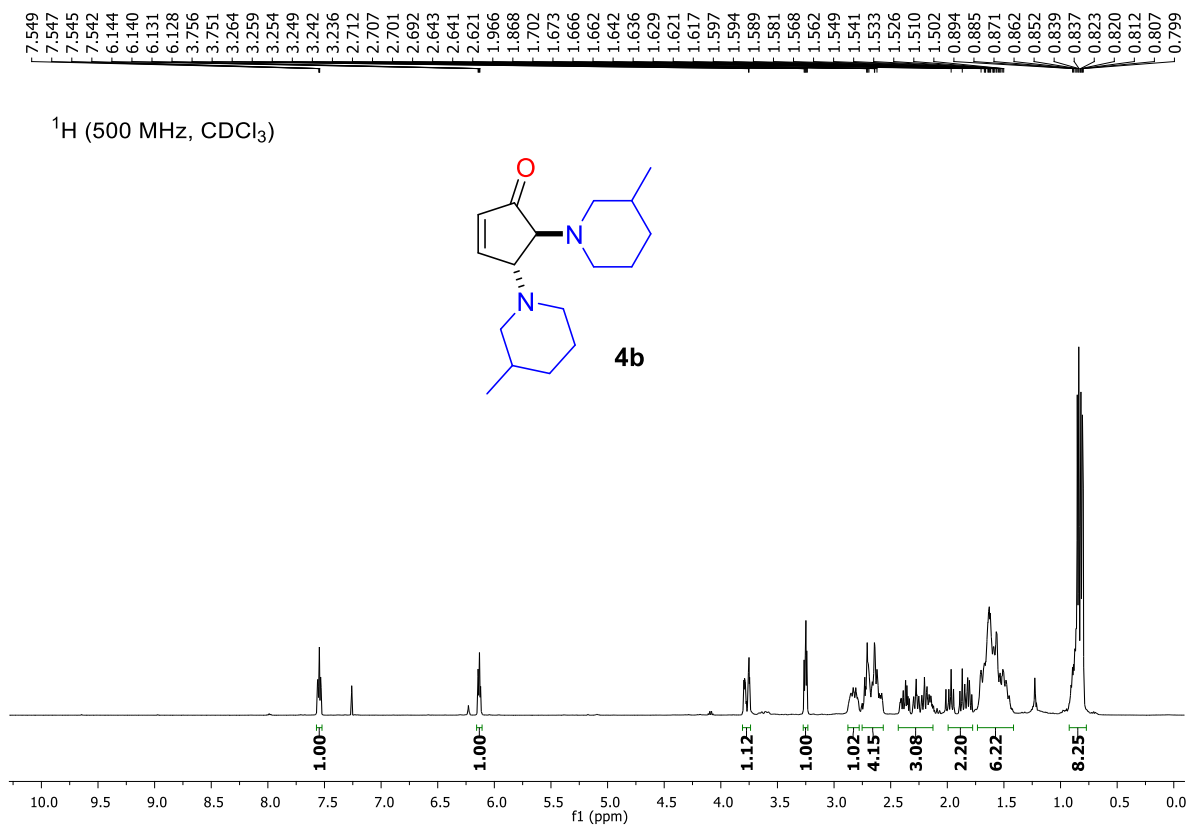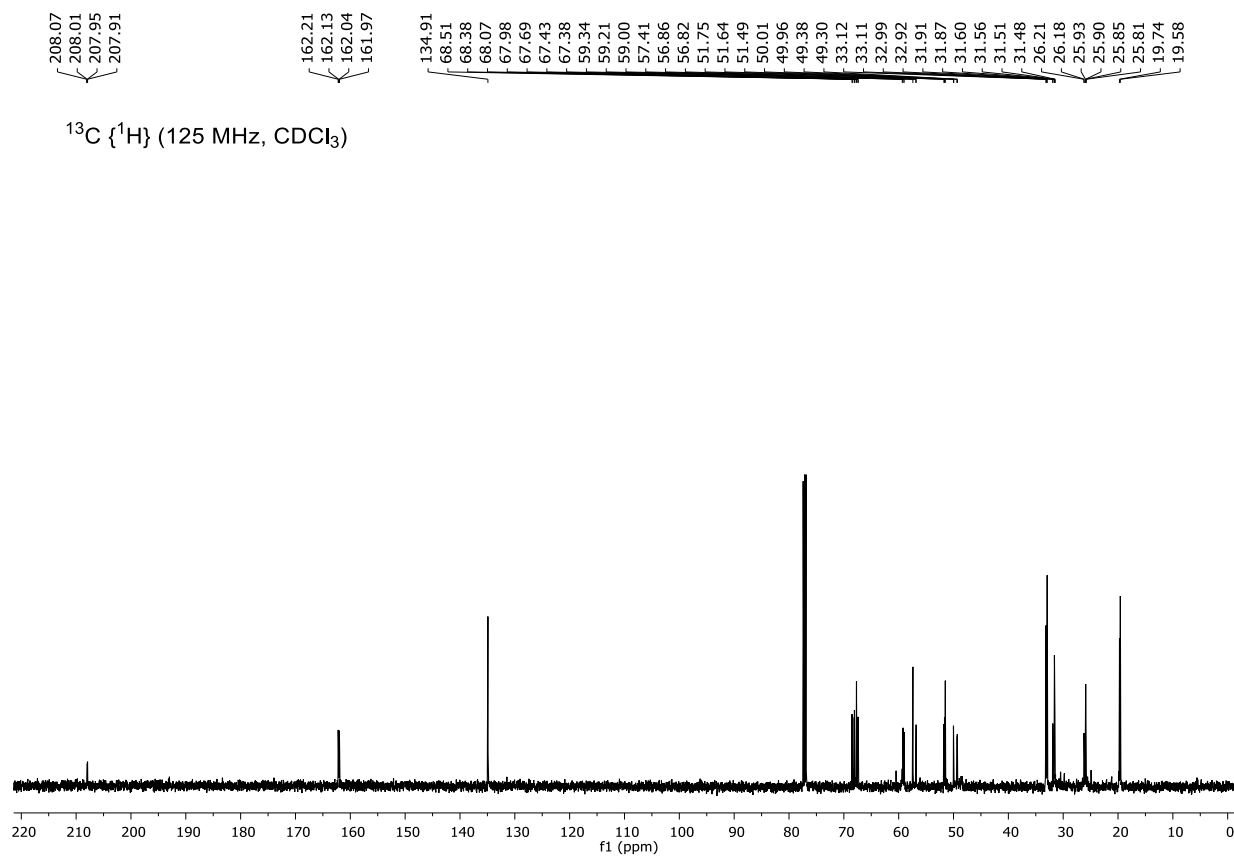



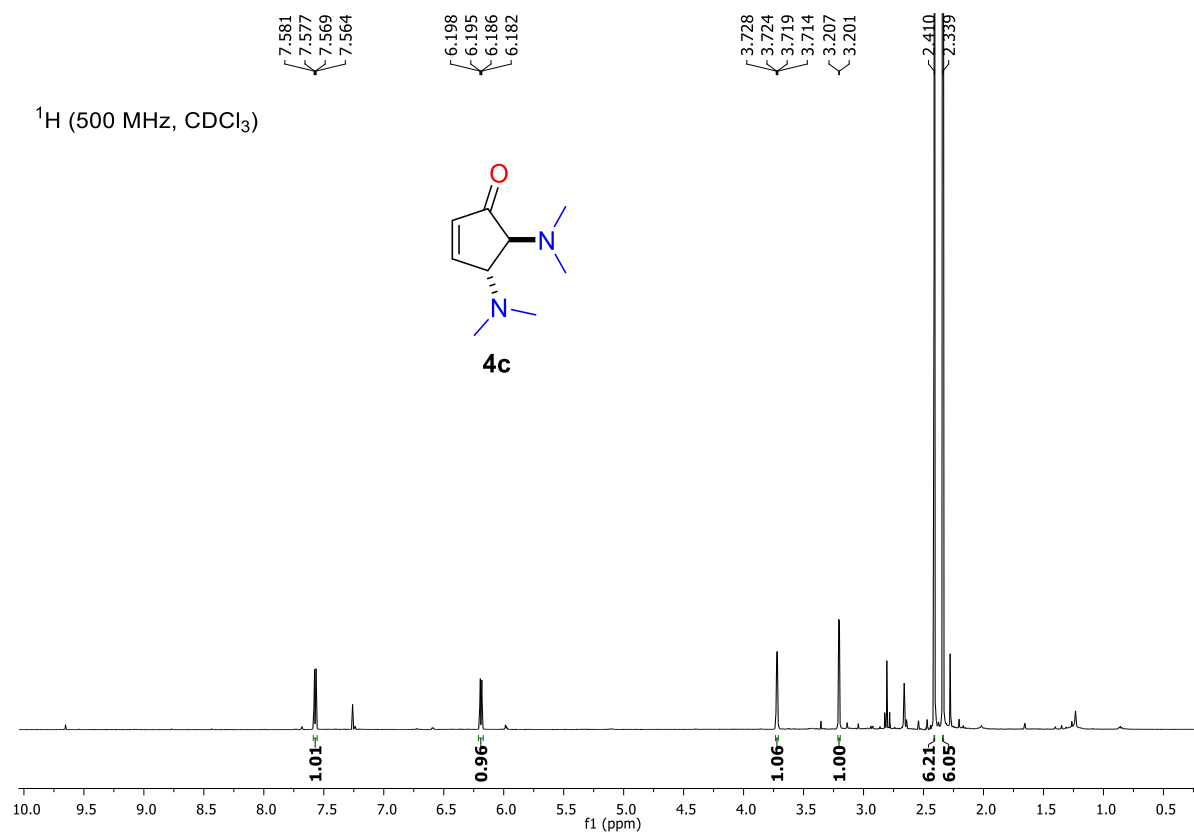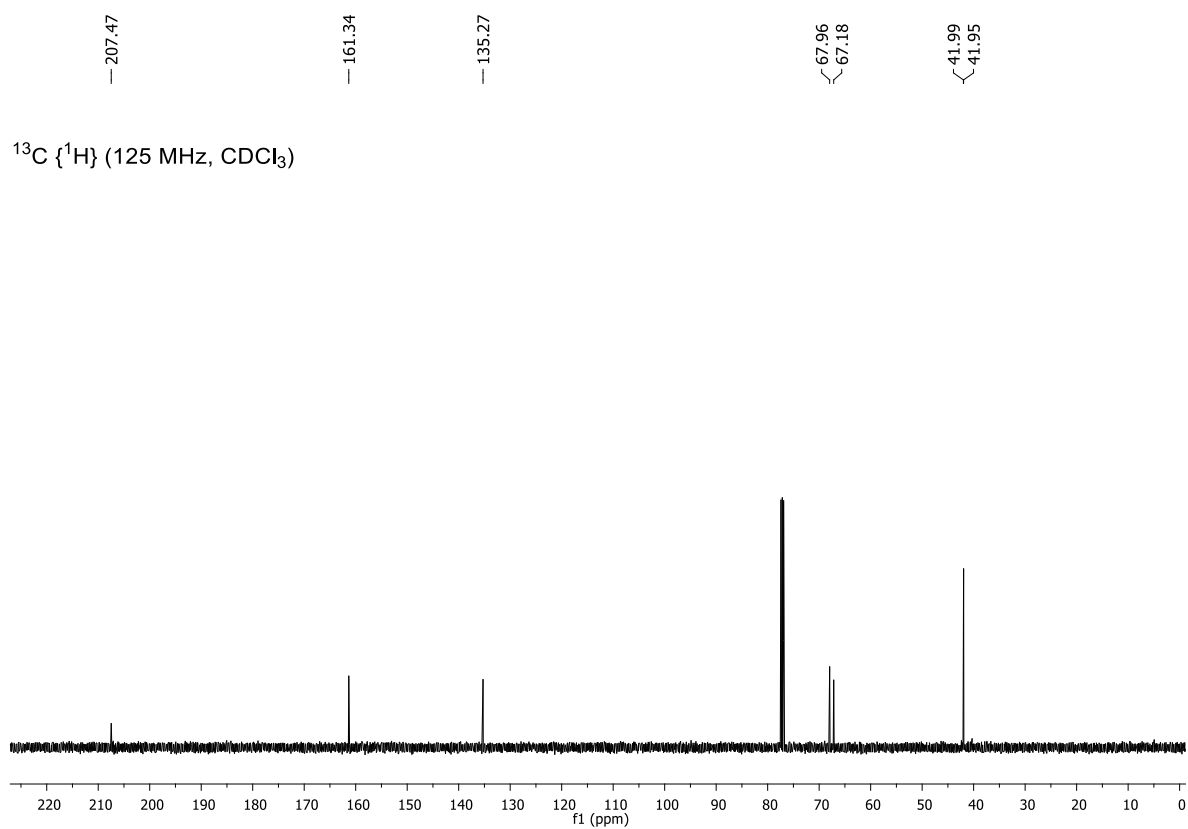

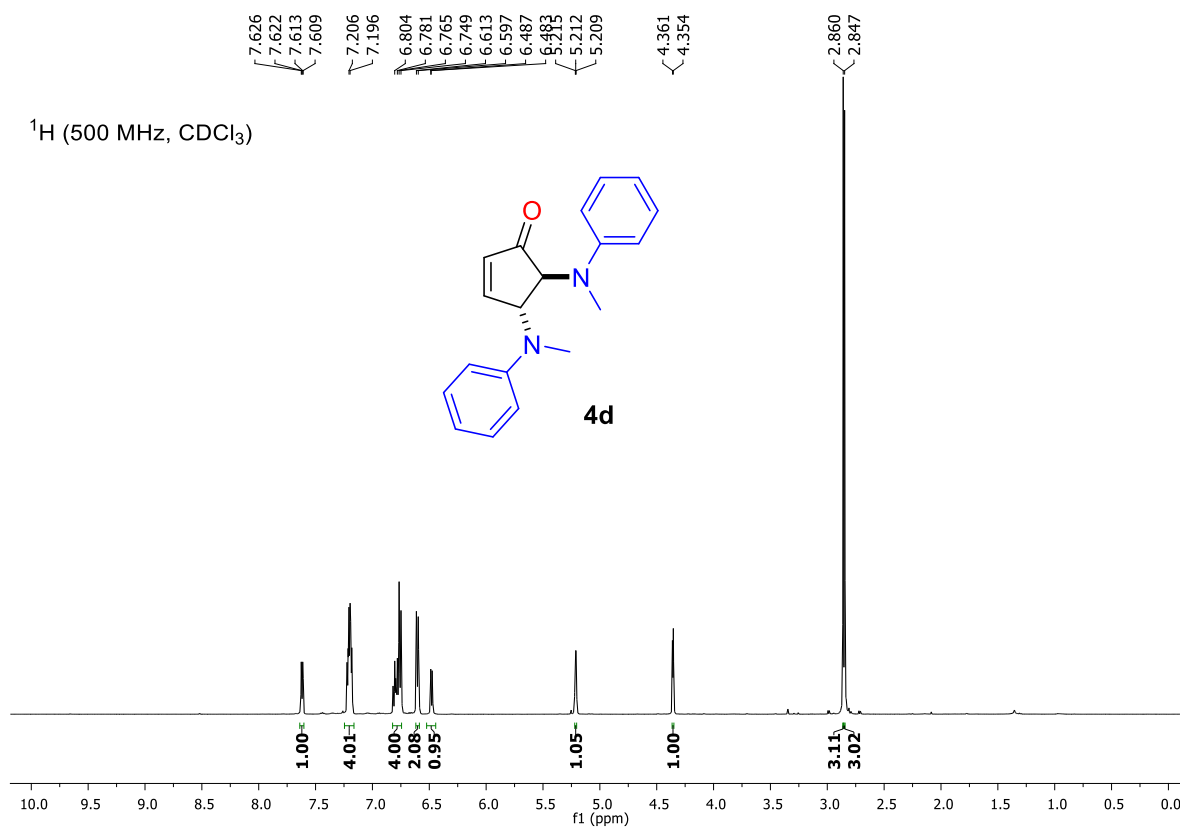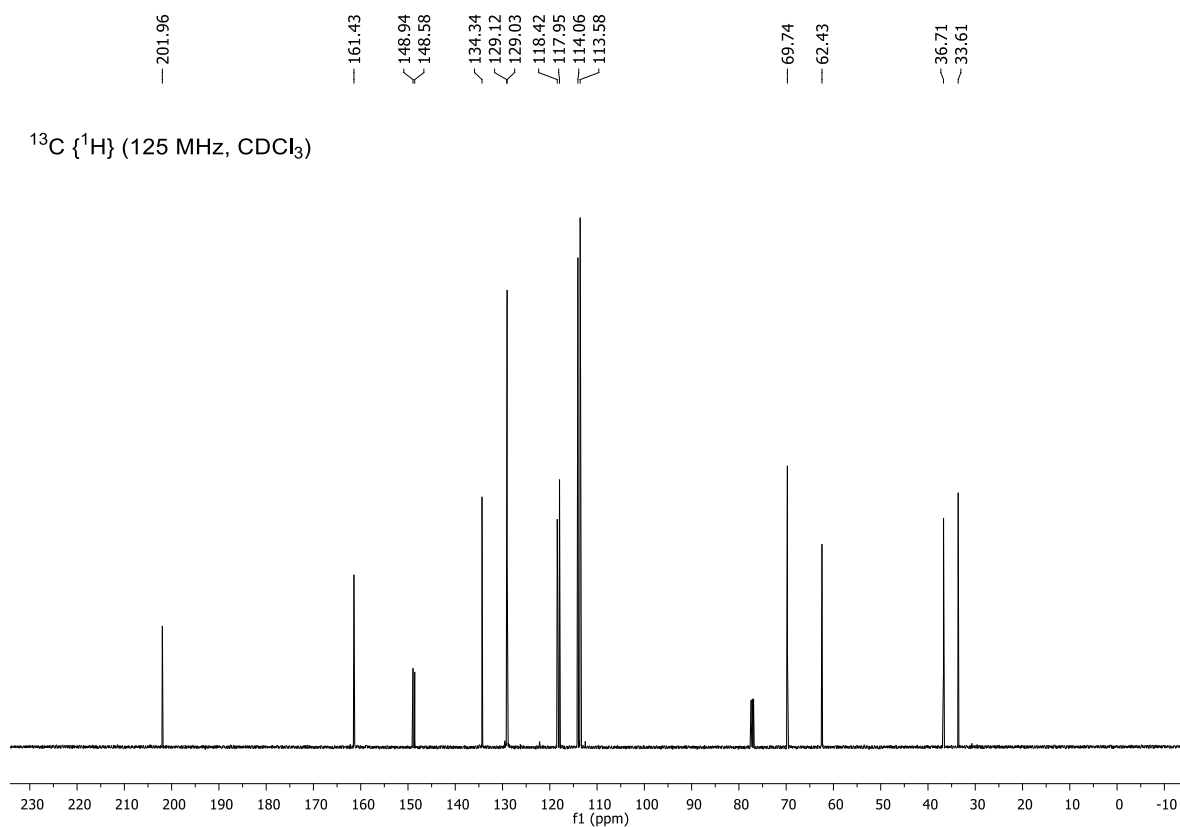

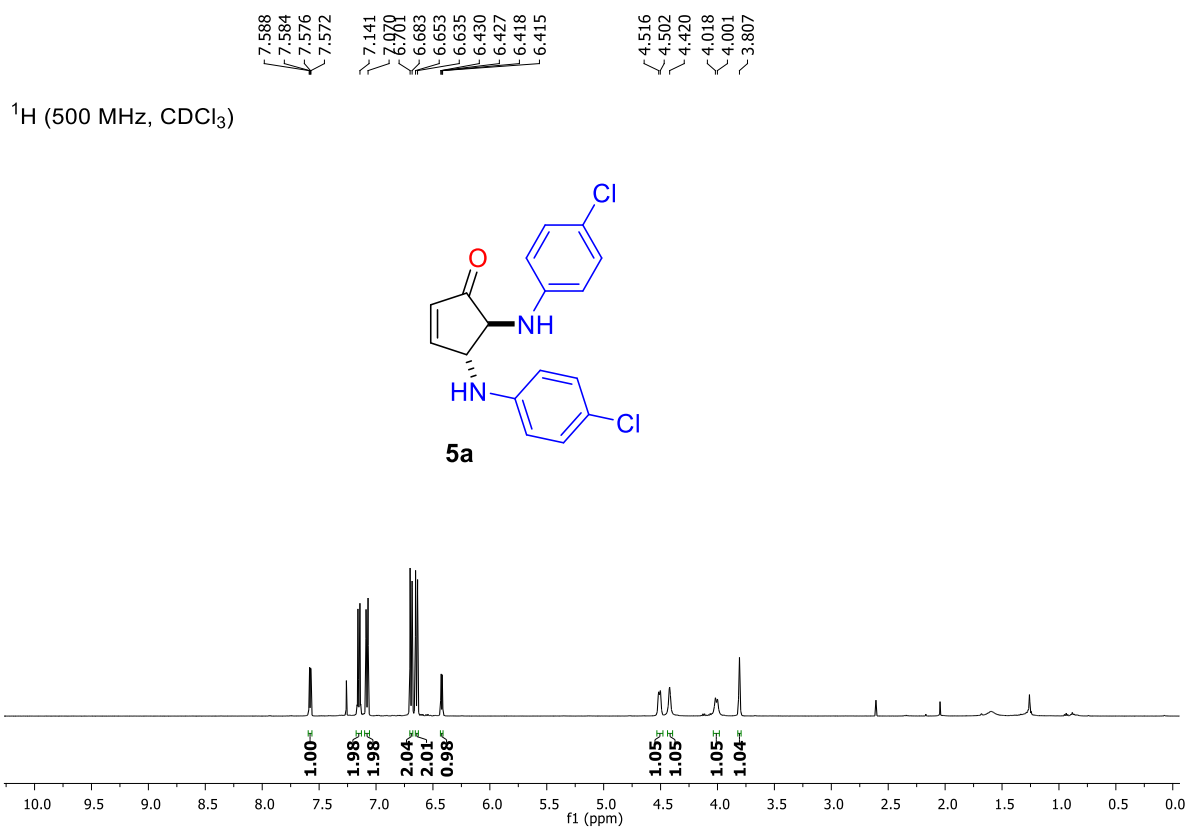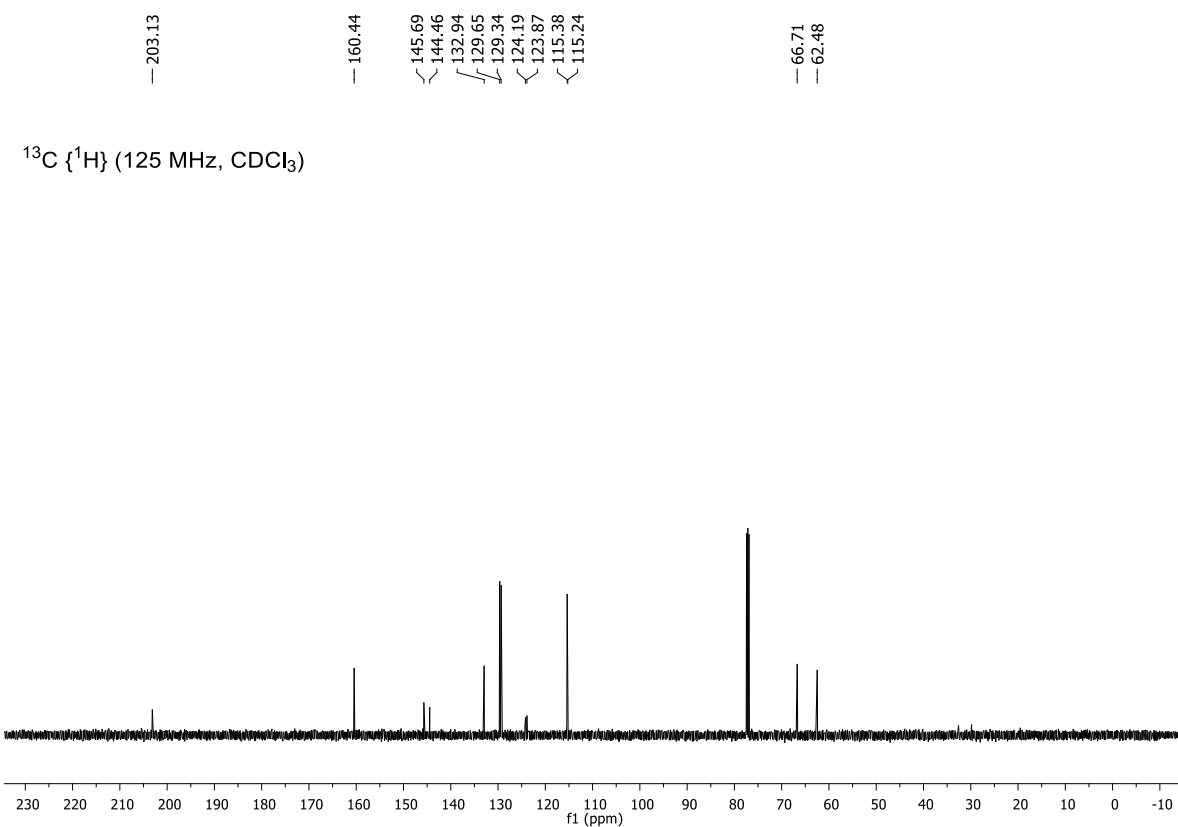

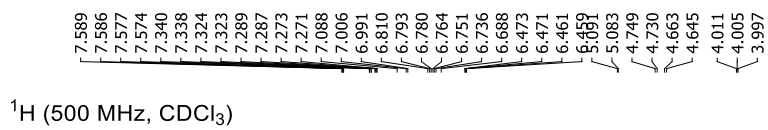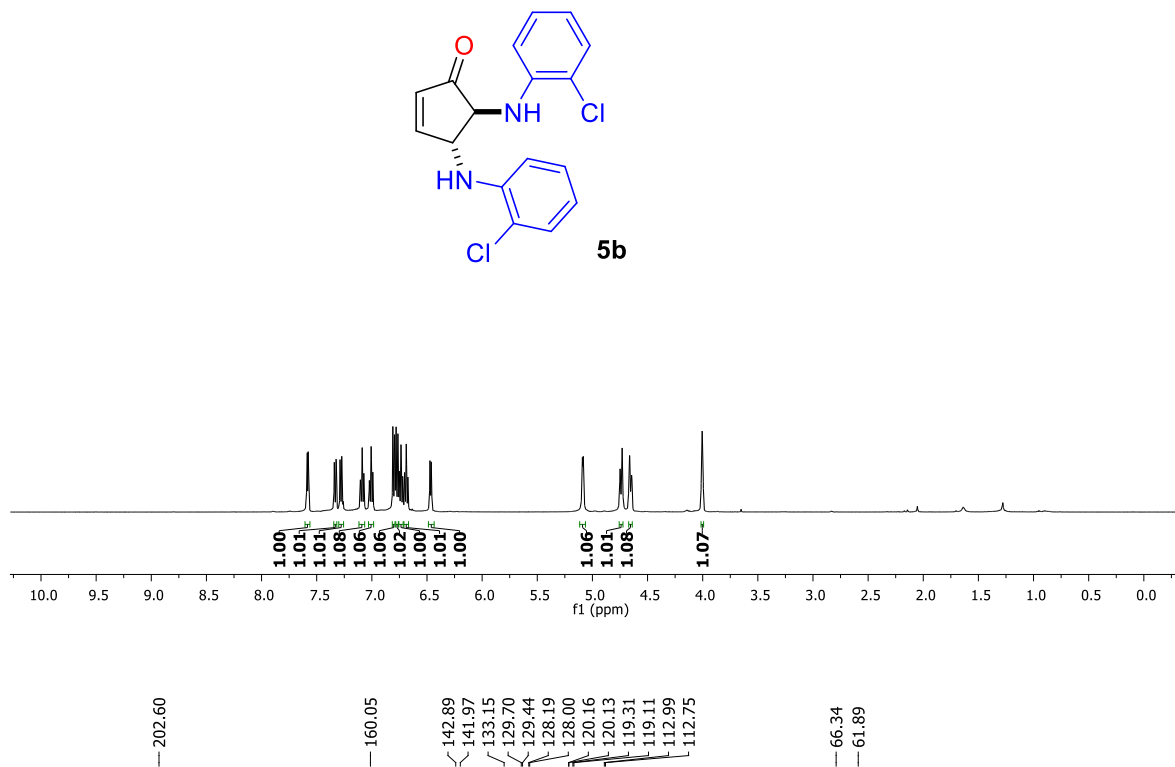

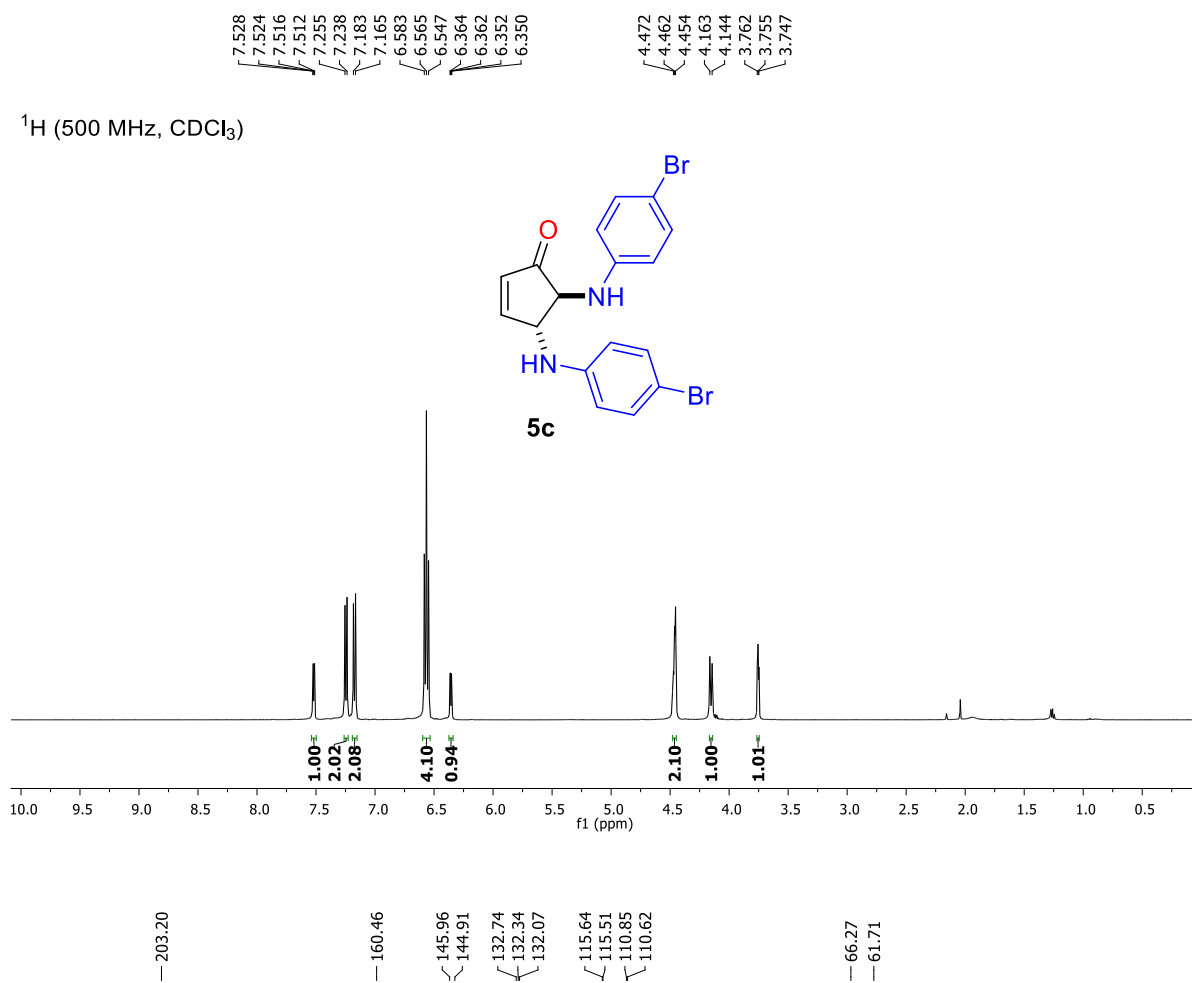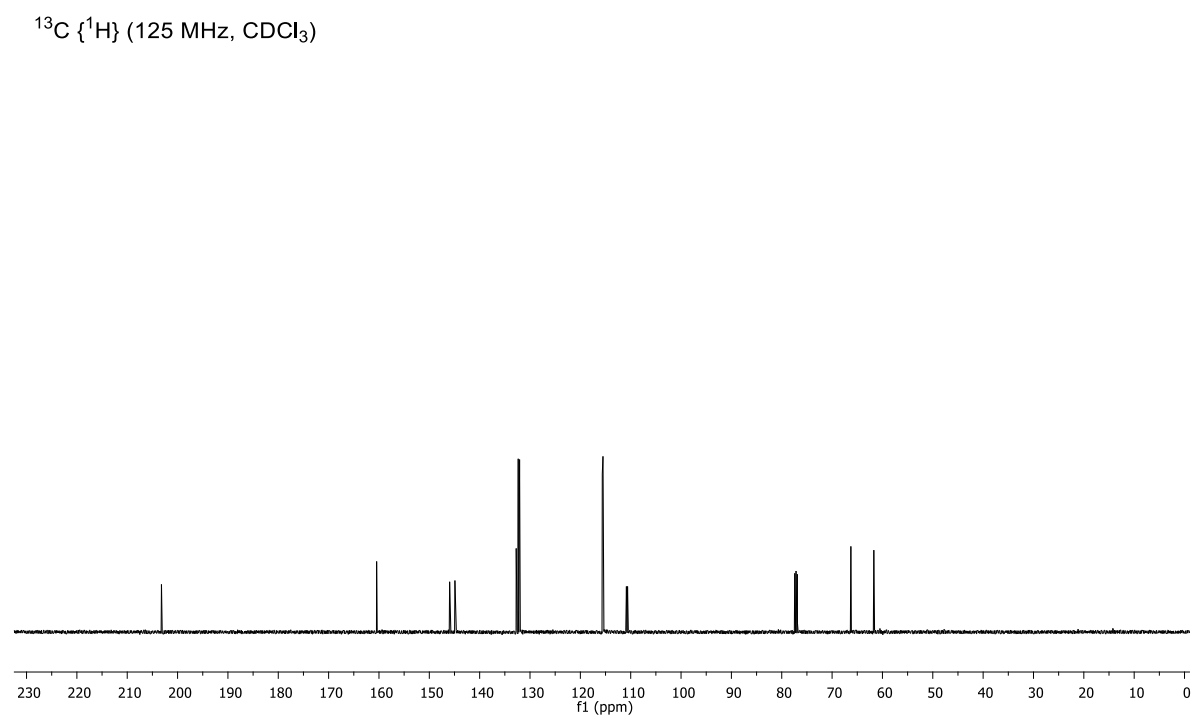

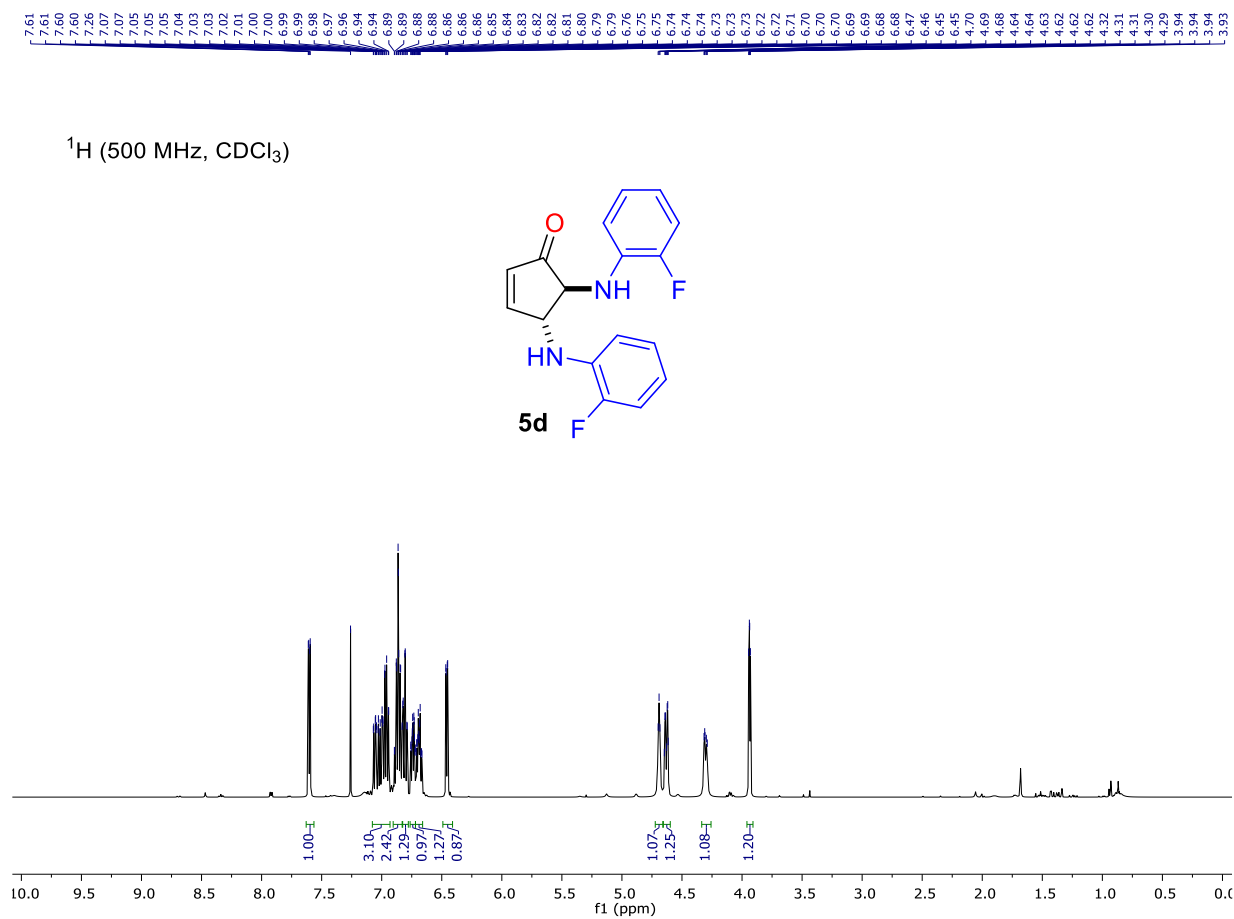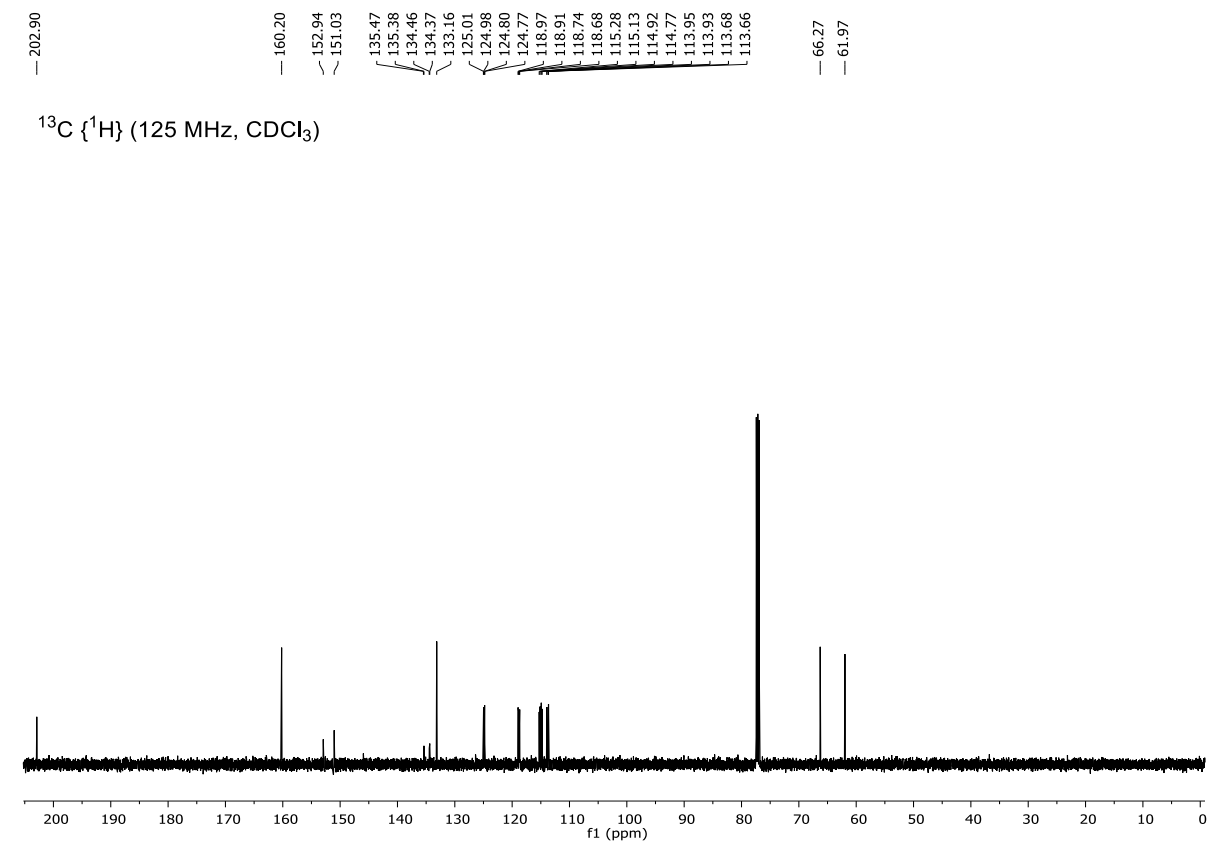

$^1\text{H}$  (500 MHz,  $\text{CDCl}_3$ )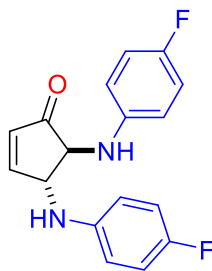**5e**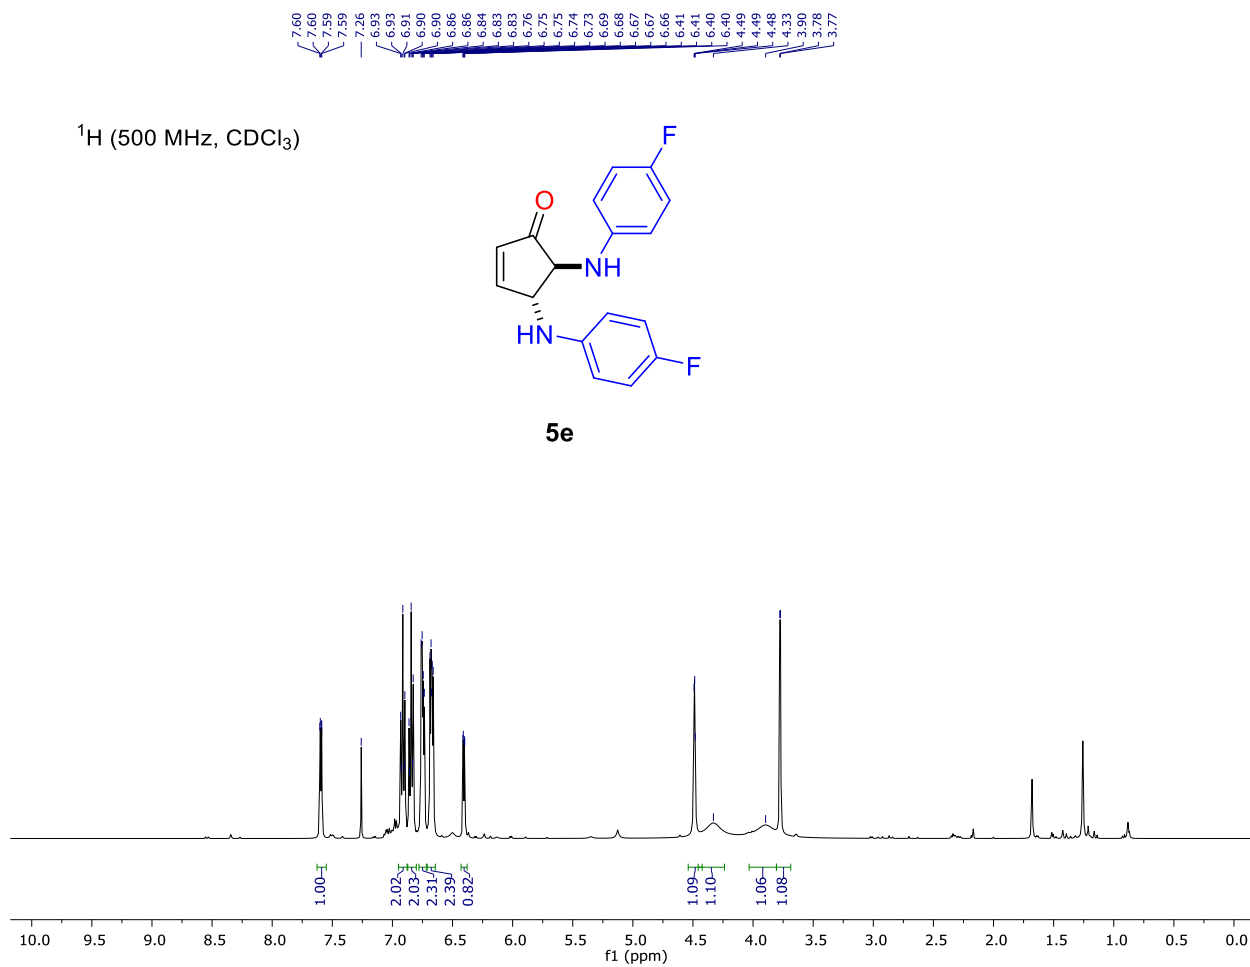 $^{13}\text{C}$  { $^1\text{H}$ } (125 MHz,  $\text{CDCl}_3$ )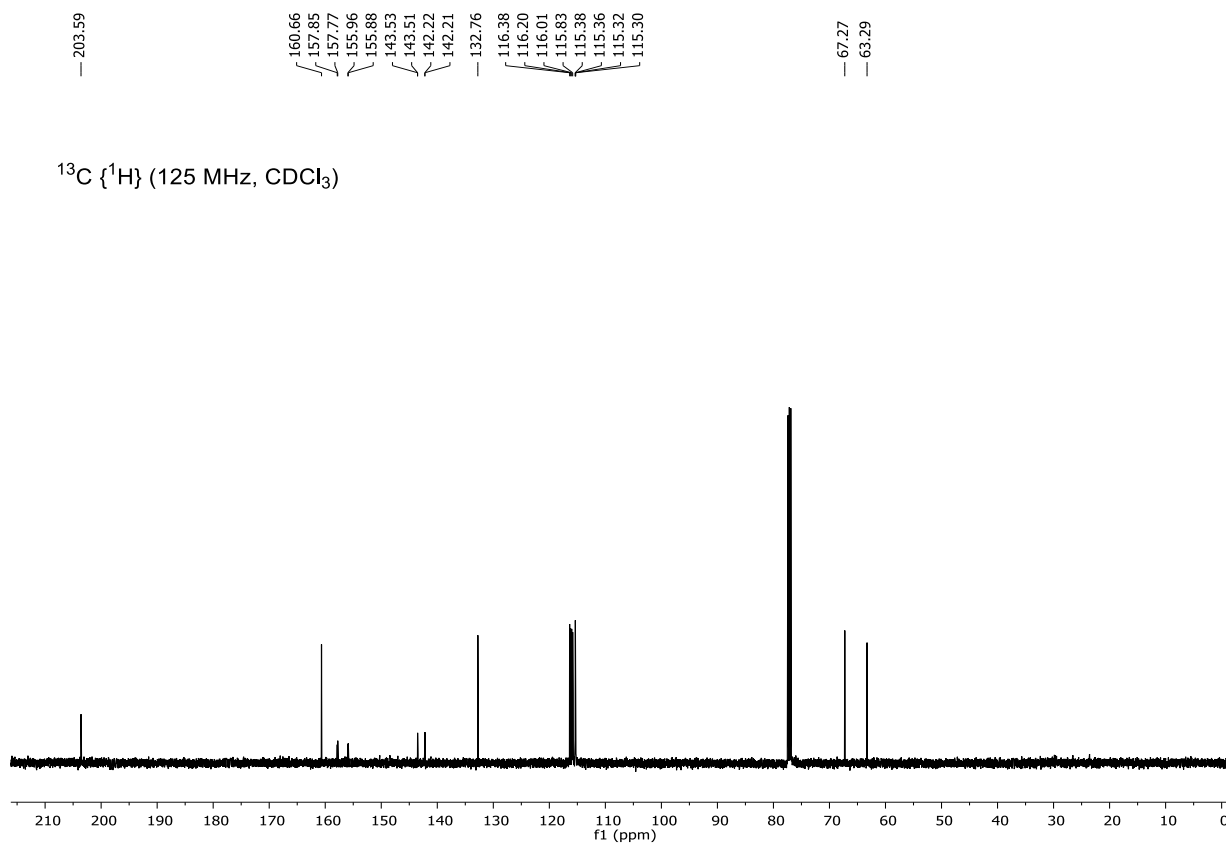

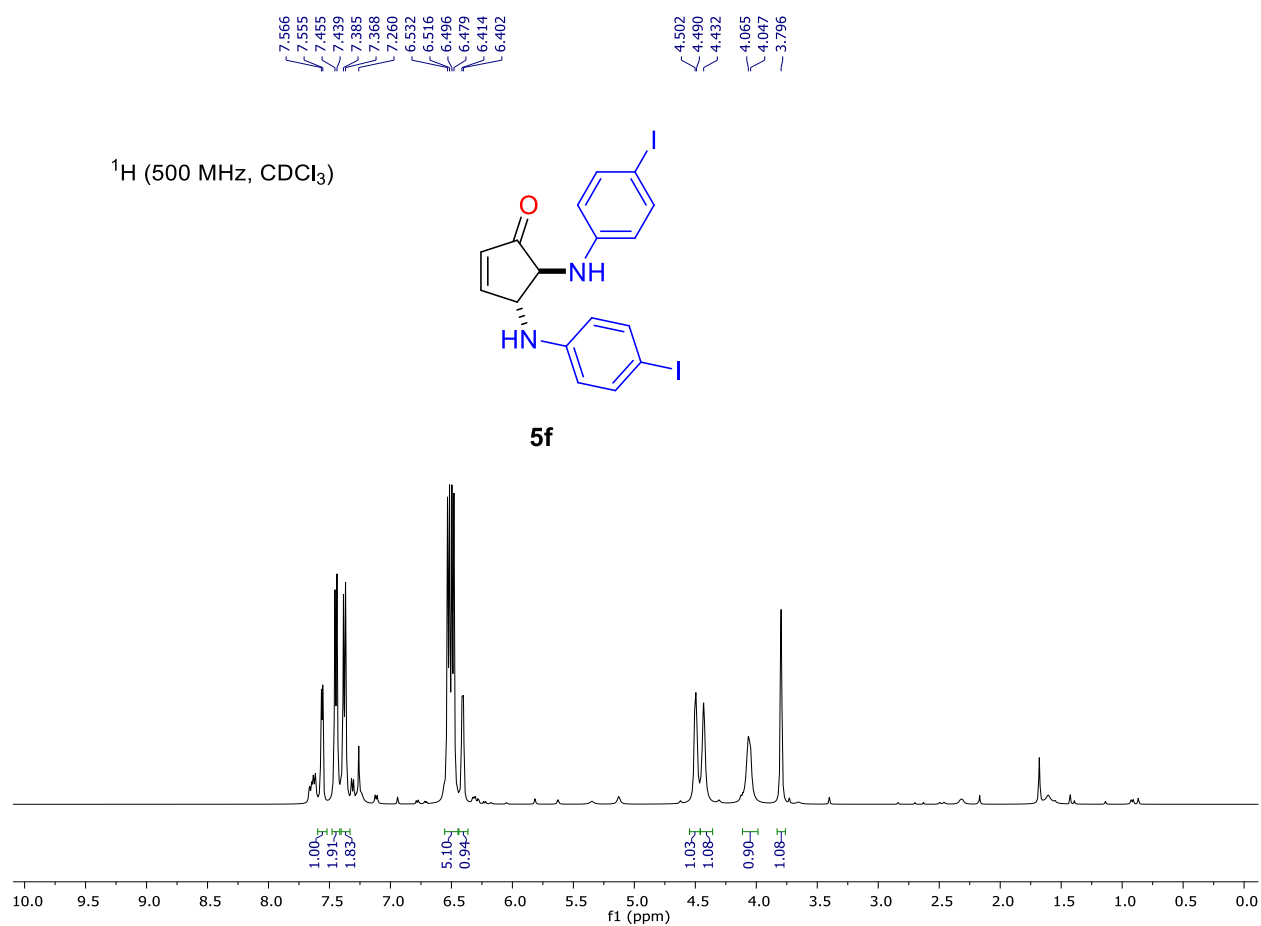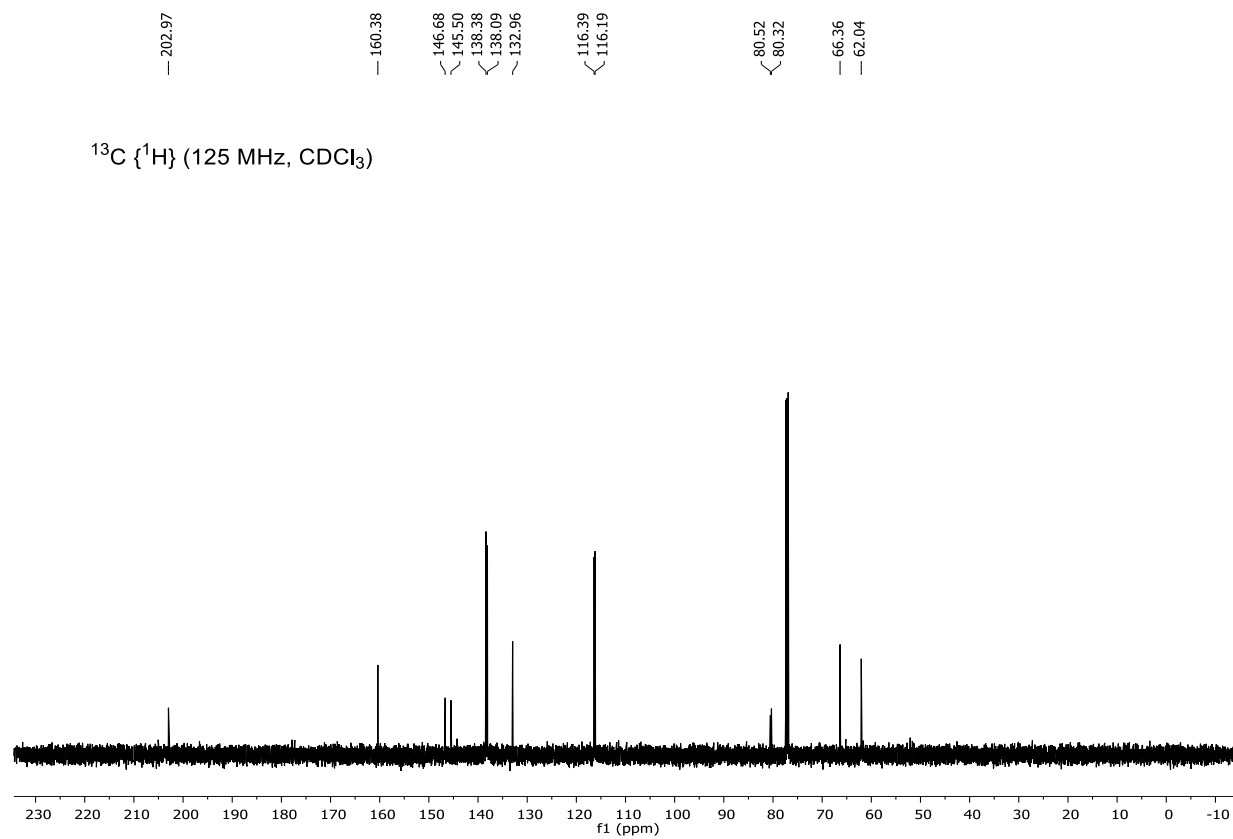



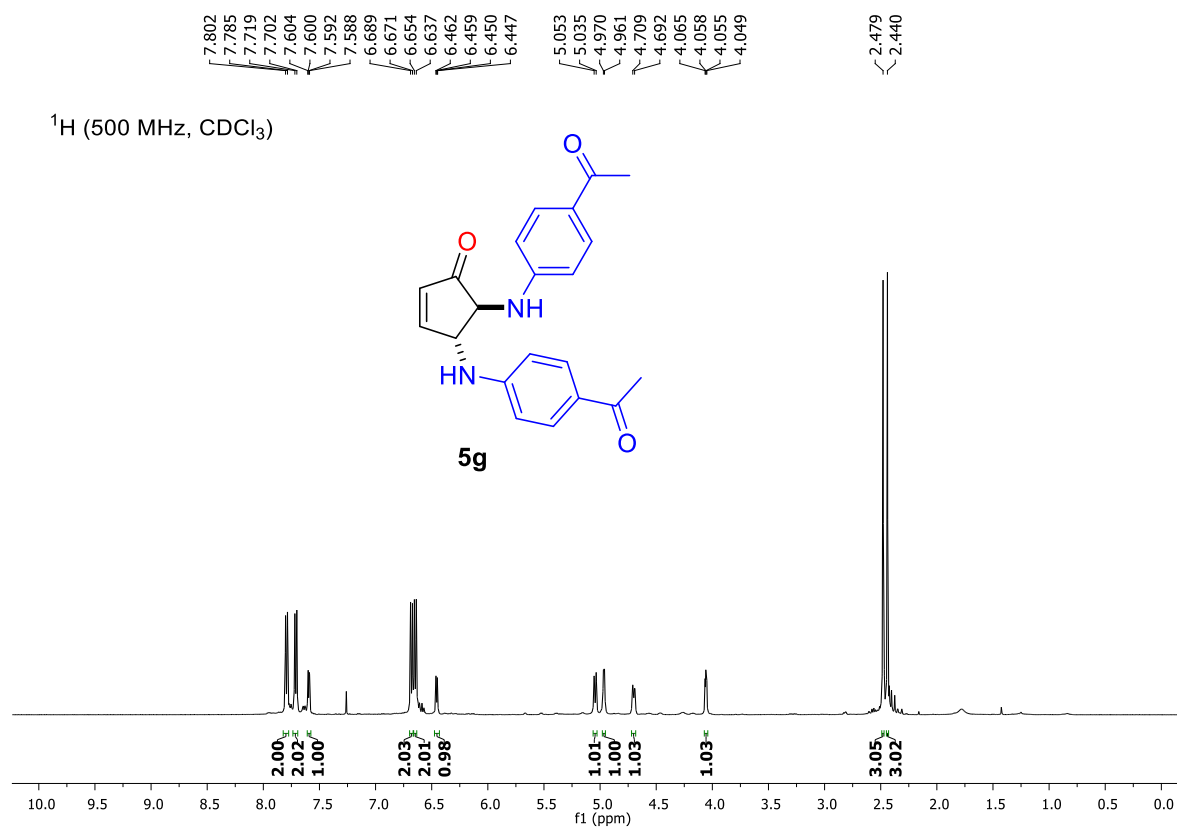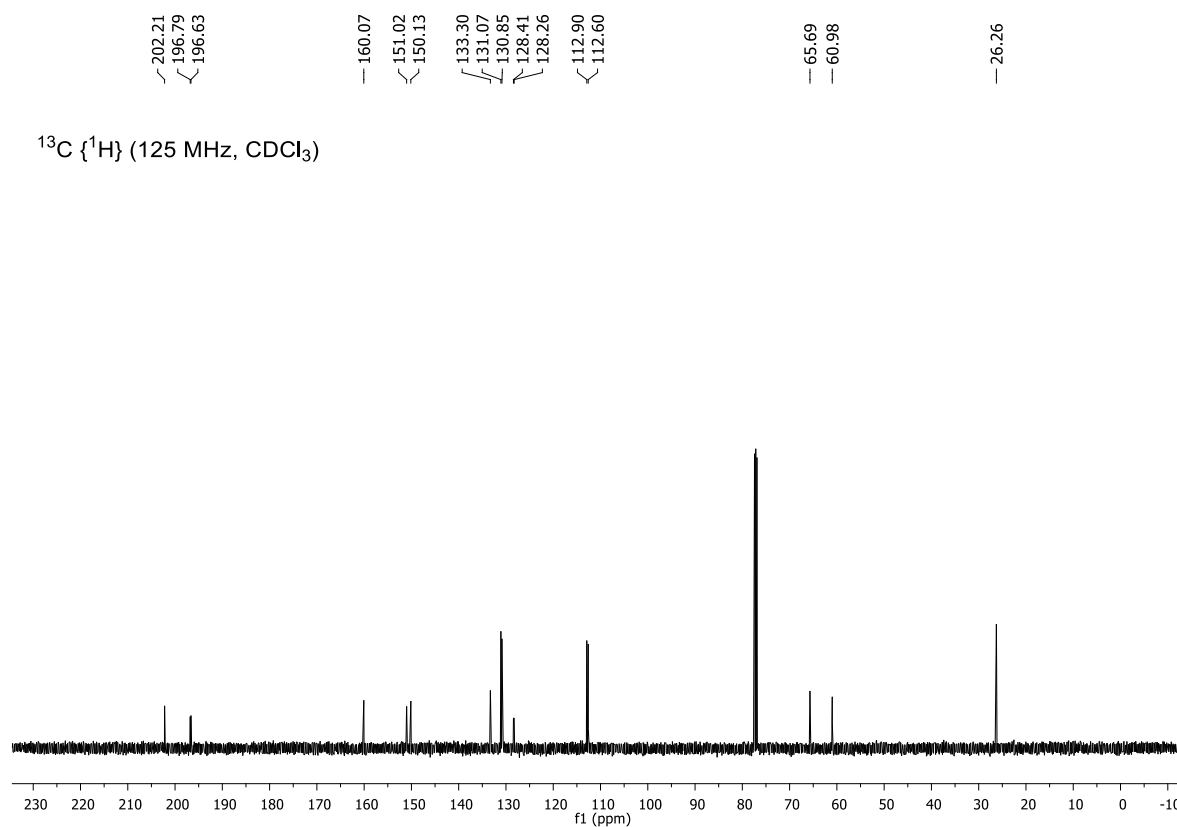

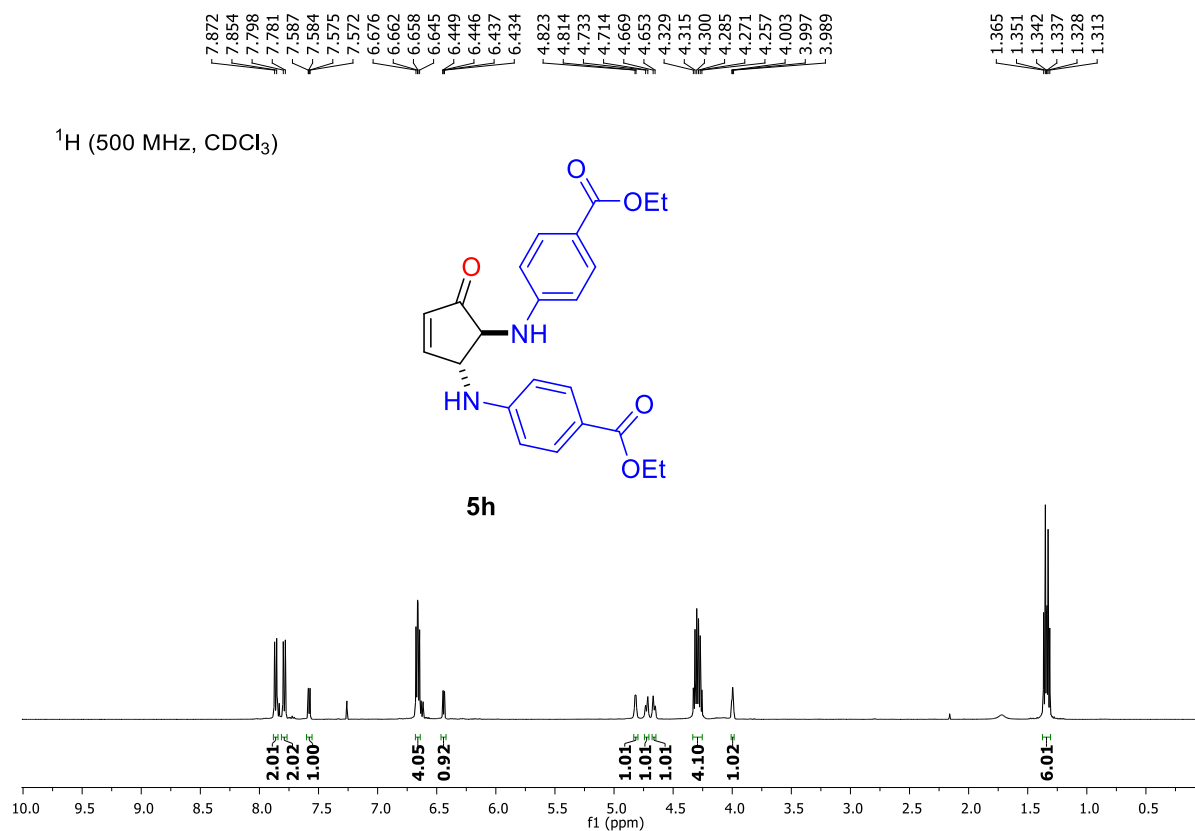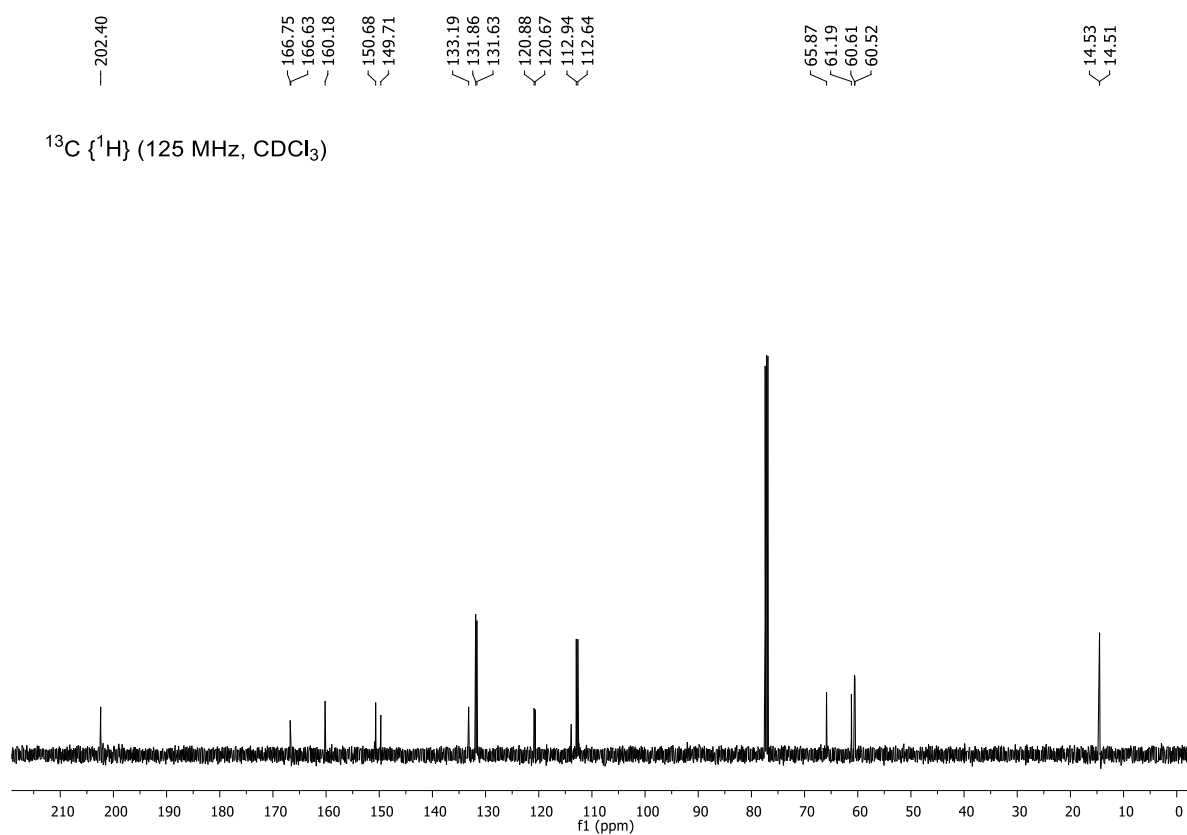

$^1\text{H}$  (500 MHz,  $\text{DMSO-}d_6$ )

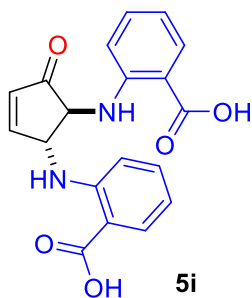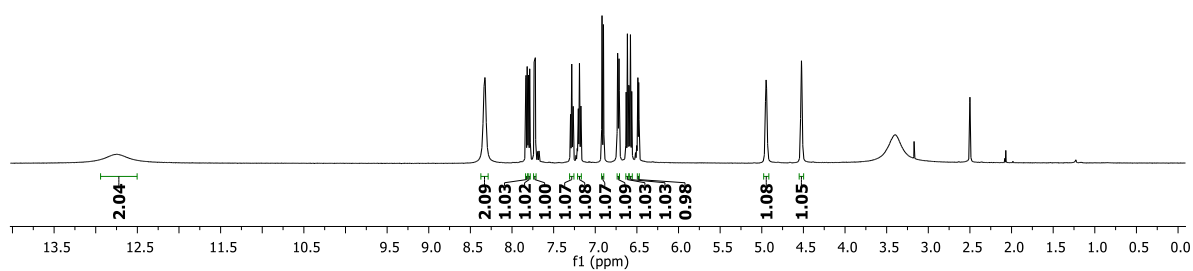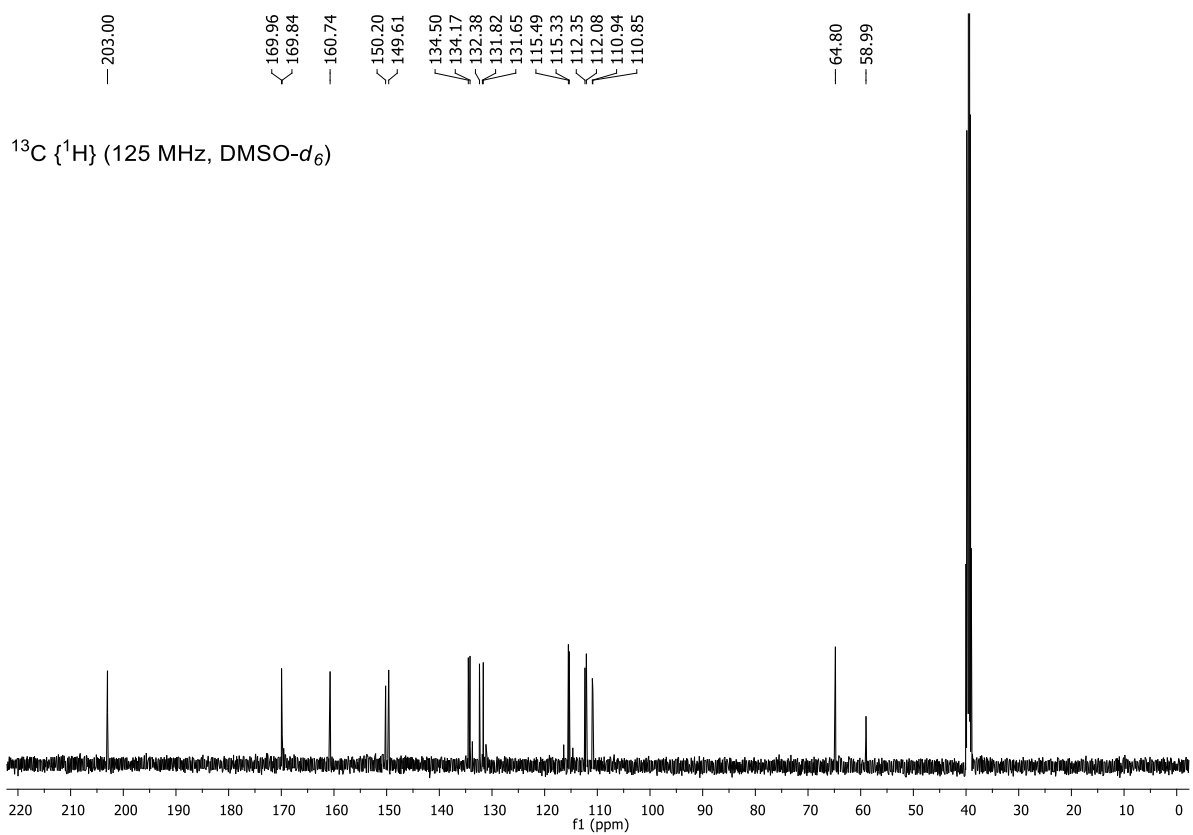

$\begin{matrix} 7.712 \\ 7.700 \\ 7.471 \\ 7.454 \\ 7.430 \\ 7.413 \end{matrix}$ 
 $\begin{matrix} 6.768 \\ 6.751 \\ 6.683 \\ 6.666 \\ 6.460 \\ 6.448 \end{matrix}$ 
 $\begin{matrix} 5.076 \\ 4.763 \end{matrix}$ 
 $\begin{matrix} 4.273 \\ 4.267 \end{matrix}$

$^1\text{H}$  (500 MHz,  $\text{DMSO}-d_6$ )

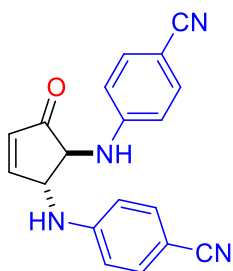

5j

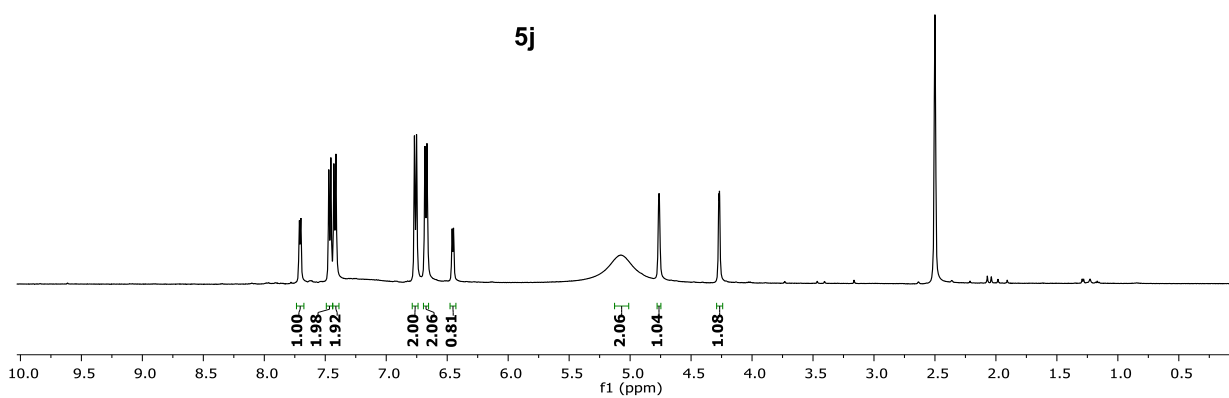

$\begin{matrix} 203.09 \\ 160.86 \\ 151.61 \\ 150.97 \end{matrix}$ 
 $\begin{matrix} 133.55 \\ 133.31 \\ 132.50 \end{matrix}$ 
 $\begin{matrix} 120.36 \\ 120.28 \\ 112.50 \\ 112.50 \end{matrix}$ 
 $\begin{matrix} 97.01 \\ 96.75 \end{matrix}$ 
 $\begin{matrix} 63.47 \\ 58.10 \end{matrix}$

$^{13}\text{C}$  { $^1\text{H}$ } (125 MHz,  $\text{DMSO}-d_6$ )

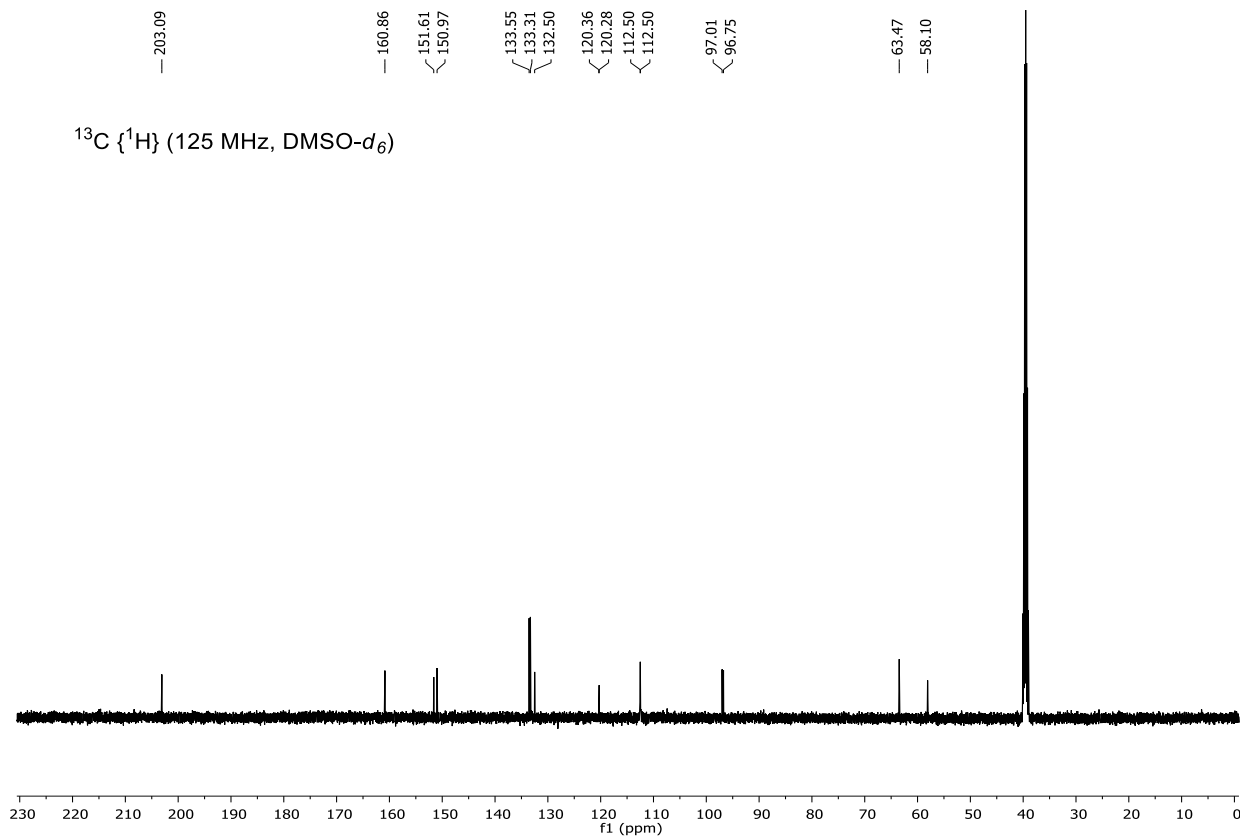

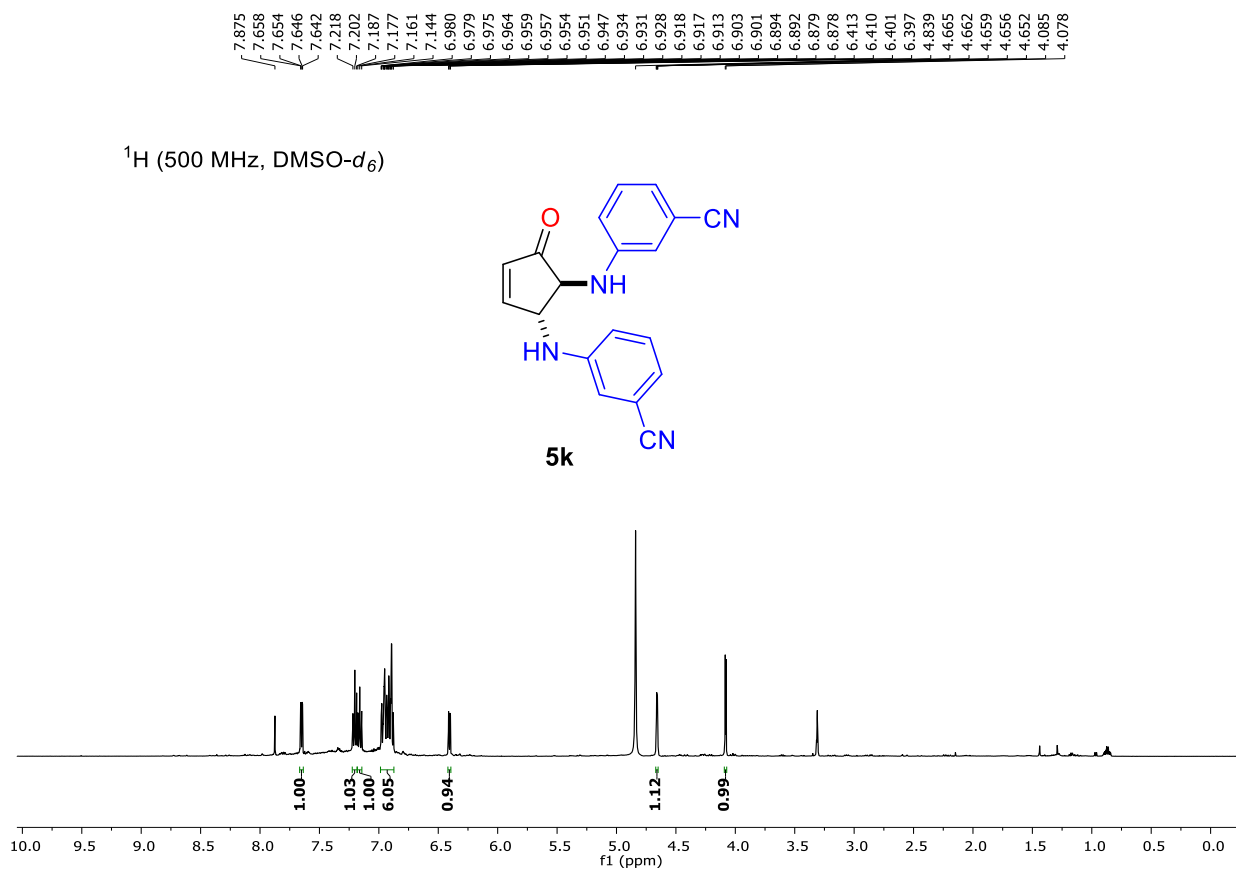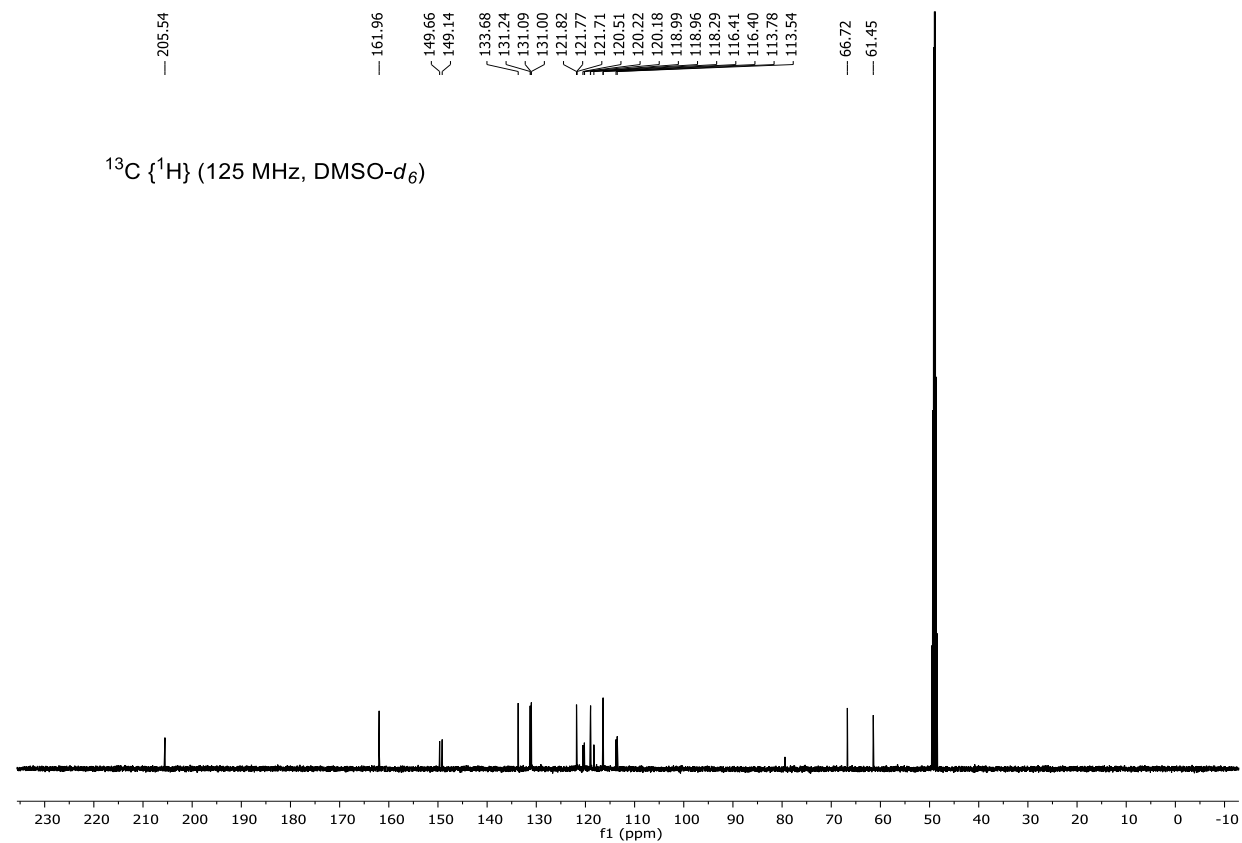

$^1\text{H}$  (500 MHz,  $\text{CD}_3\text{CN}$ )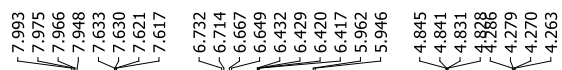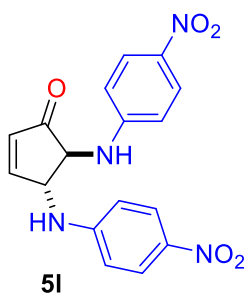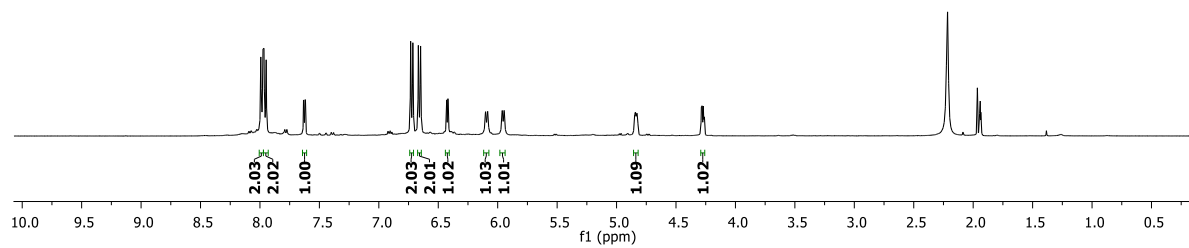 $^{13}\text{C}$  { $^1\text{H}$ } (125 MHz,  $\text{CD}_3\text{CN}$ )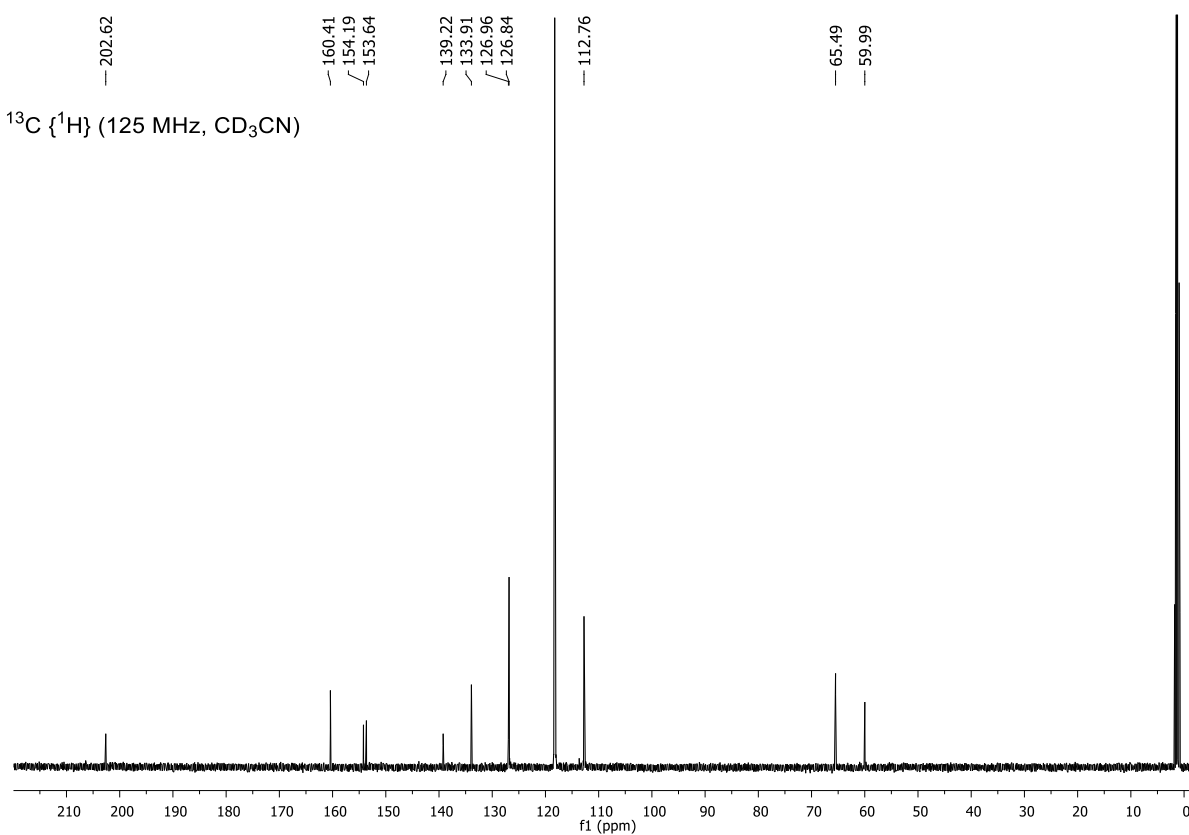

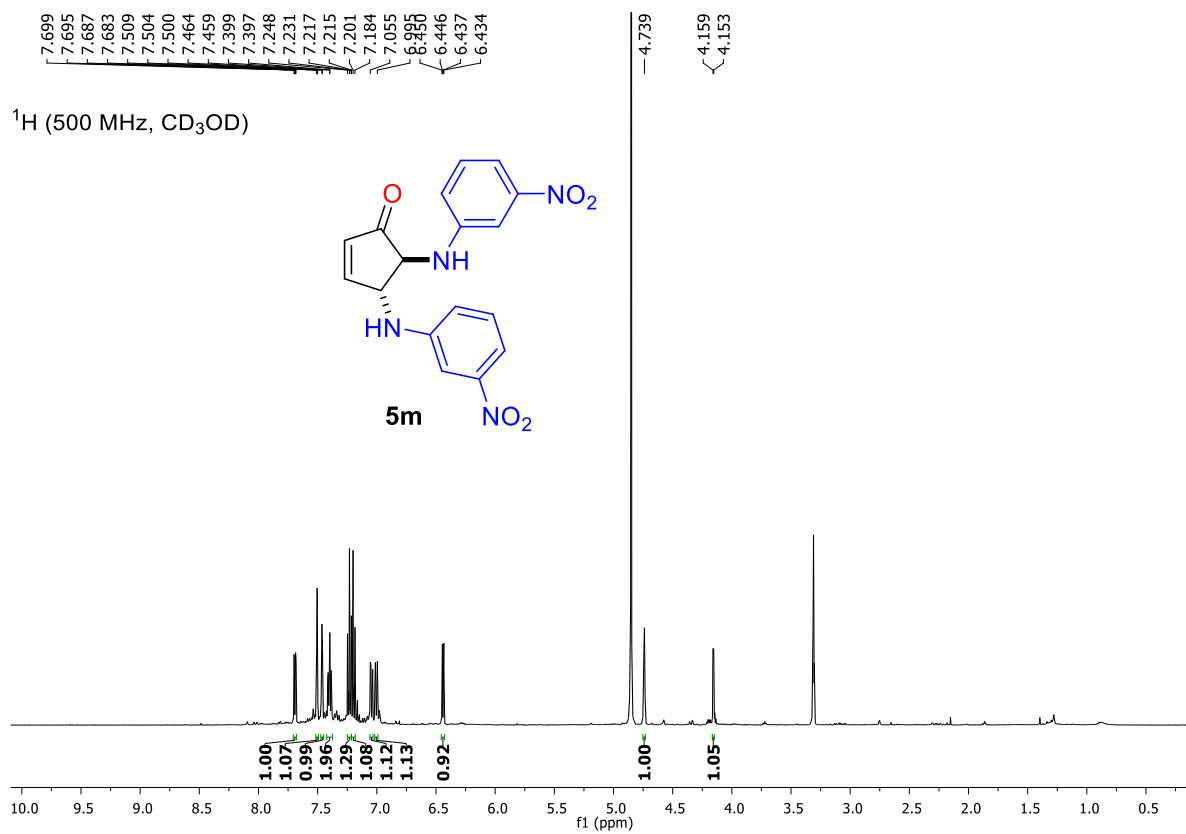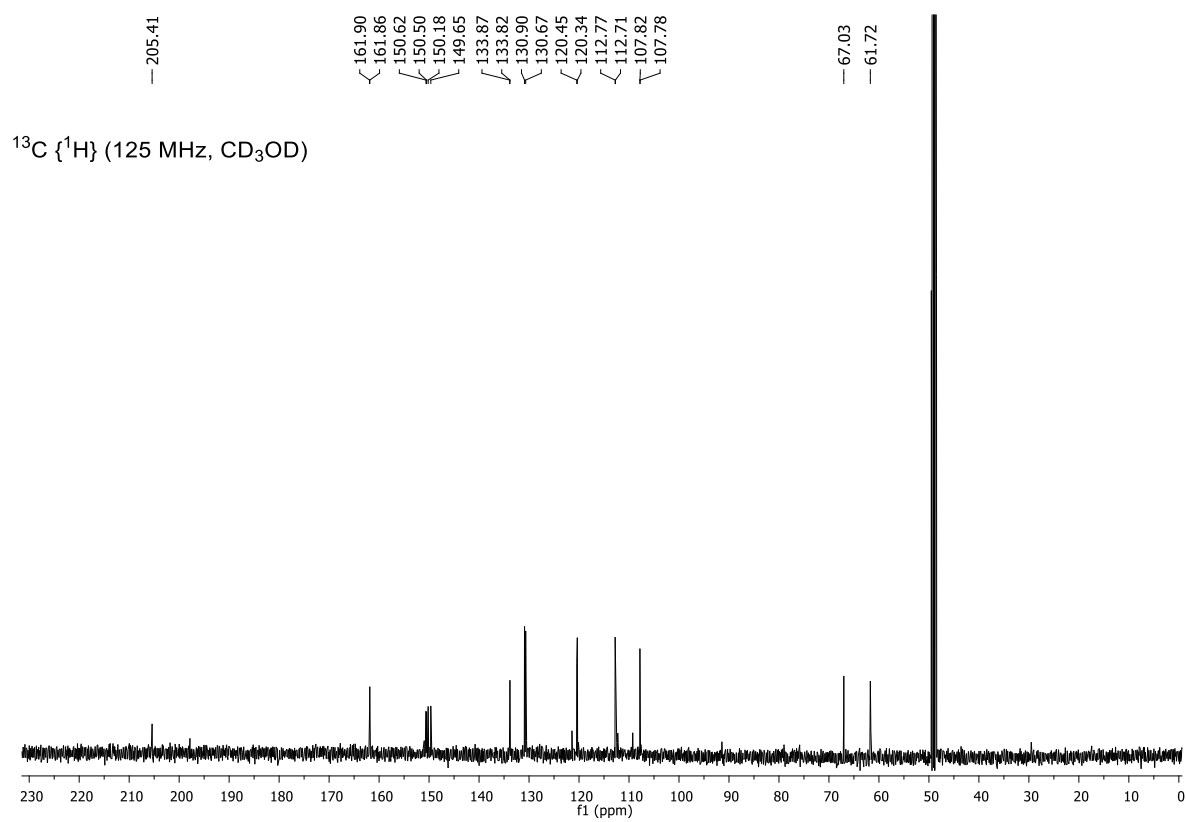

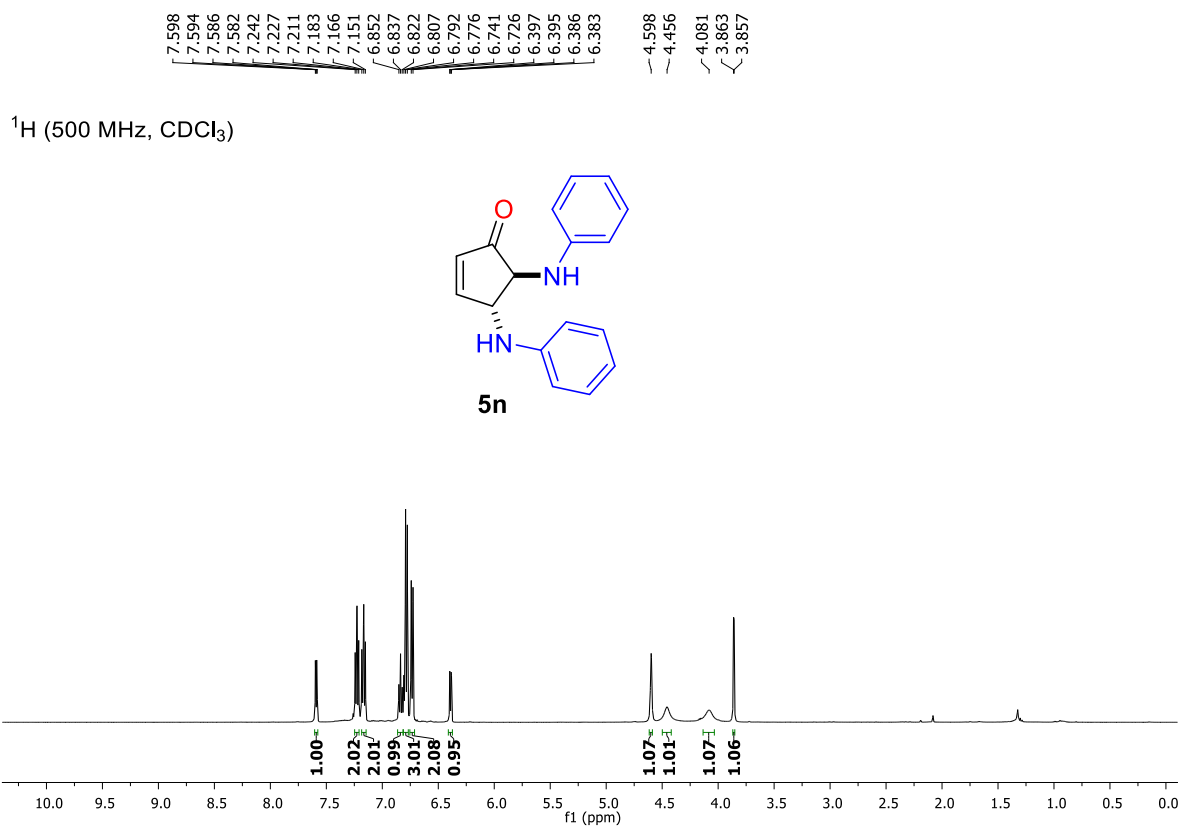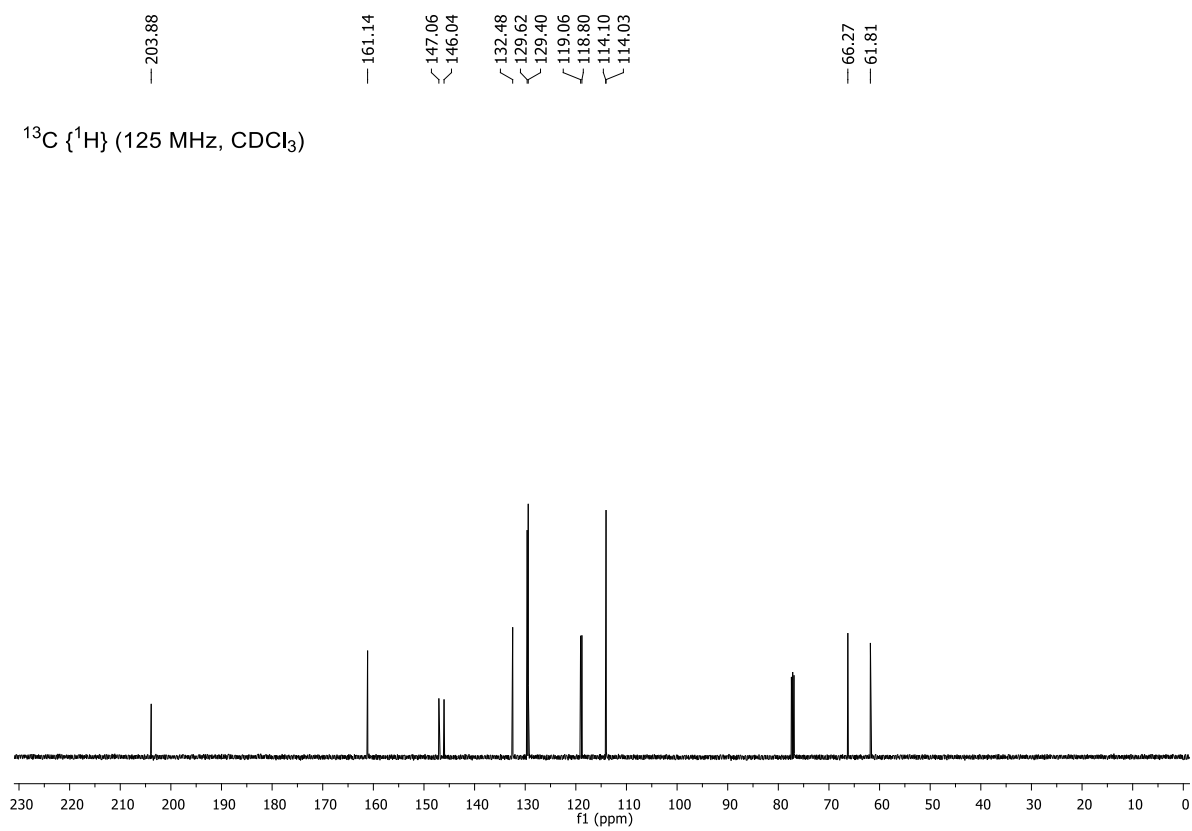



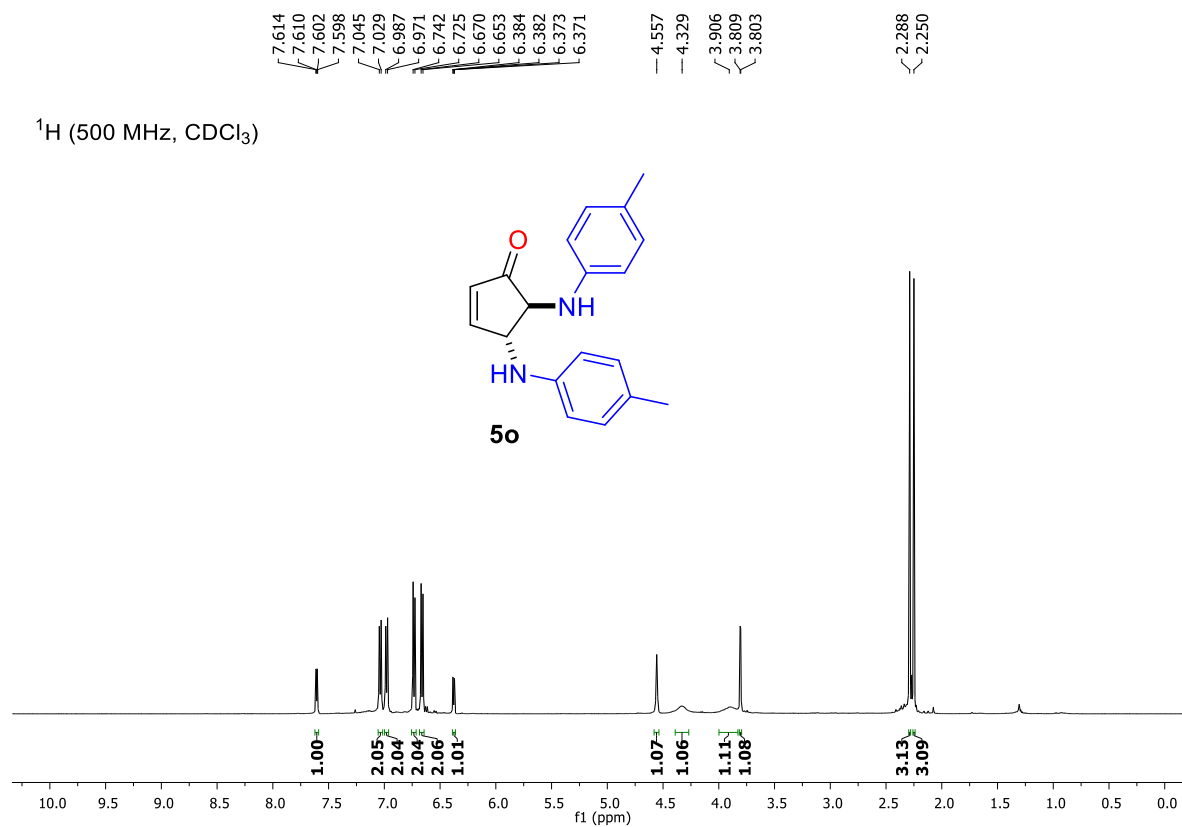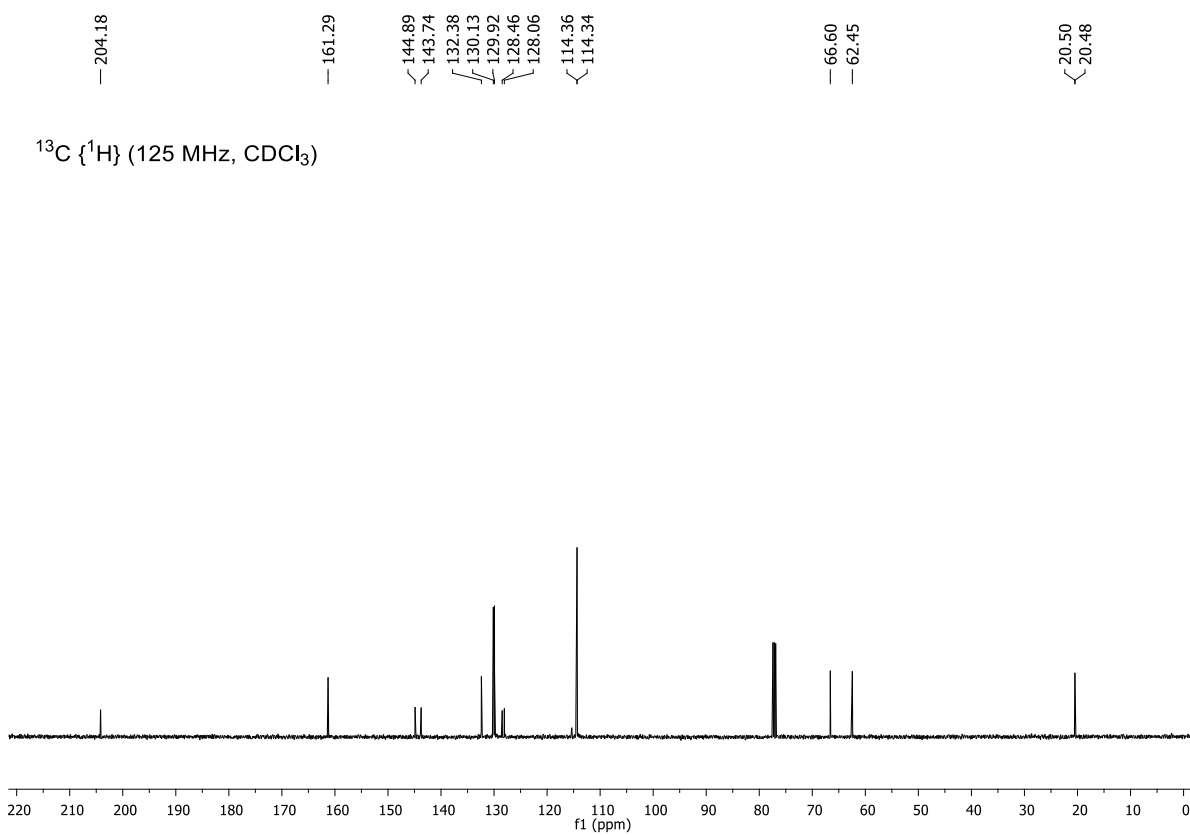

Supplement: s1 [file s1]
